# Supplementary material
Source: PubMed Central journal article supplement (PMC8689411)
Supplement: mmc1.pdf [file mmc1.pdf]

# THE LANCET

## Supplementary appendix

This appendix formed part of the original submission and has been peer reviewed. We post it as supplied by the authors.

Supplement to: Munro APS, Janani L, Cornelius V, et al. Safety and immunogenicity of seven COVID-19 vaccines as a third dose (booster) following two doses of ChAdOx1 nCov-19 or BNT162b2 in the UK (COV-BOOST): a blinded, multicentre, randomised, controlled, phase 2 trial. *Lancet* 2021; published online Dec 2. [https://doi.org/10.1016/S0140-6736\(21\)02717-3](https://doi.org/10.1016/S0140-6736(21)02717-3).

# Safety and immunogenicity of seven COVID-19 vaccines as a third dose (booster) following two doses of ChAdOx1 nCov19 or BNT162b2 in the UK (COV-BOOST): a blinded, multicentre, randomised, controlled, phase 2 trial

## Supplementary Appendix 1

### Contents

|                                                                                         |           |
|-----------------------------------------------------------------------------------------|-----------|
| <b>Supplementary Tables</b> .....                                                       | <b>2</b>  |
| Supplementary Table 1: Summary of Adverse Events (Group A) .....                        | 2         |
| Supplementary Table 2: Summary of Adverse Events (Group B) .....                        | 5         |
| Supplementary Table 3: Summary of Adverse Events (Group C) .....                        | 8         |
| Supplementary Table 4: Adverse Events of Special Interest .....                         | 11        |
| Supplementary Table 5: COVID-19 cases .....                                             | 13        |
| Supplementary Table 6: Serious Adverse Events .....                                     | 14        |
| Supplementary Table 7: Baseline vs Day 28 immunogenicity .....                          | 17        |
| Supplementary Table 8: Baseline immunogenicity by Serostatus (anti-nucleocapsid IgG) .. | 21        |
| <b>Supplementary Figures</b> .....                                                      | <b>22</b> |
| Supplementary Figure 1: Solicited systemic and local reactions (Bar chart) .....        | 22        |
| Supplementary Figure 2: Severity of solicited reactions (Radial chart) .....            | 26        |
| Supplementary Figure 3: Kinetics of immunogenicity .....                                | 33        |
| Supplementary Figure 4: Correlation between PNA for WT and Delta .....                  | 35        |
| Supplementary Figure 5: Correlation between cellular response for WT and Beta .....     | 37        |
| Supplementary Figure 6: Correlation between cellular response for WT and Delta .....    | 39        |
| Supplementary Figure 7: Immunogenicity by Serostatus (anti-nucleocapsid IgG) .....      | 41        |
| Supplementary Figure 8: Correlation between anti-spike IgG and PNA .....                | 44        |
| Supplementary Figure 9: Correlation between anti-spike IgG and cellular response .....  | 46        |
| <b>Supplementary Laboratory Information</b> .....                                       | <b>48</b> |
| Laboratory Methods .....                                                                | 48        |
| Laboratory Units Conversion .....                                                       | 48        |
| Human SARS-CoV-2 Pre-Spike IgG ELISA Conversion .....                                   | 48        |
| Human SARS-CoV-2 Pseudoparticle Neutralisation Assay (PNA) .....                        | 48        |
| <b>COV-BOOST Study Group</b> .....                                                      | <b>49</b> |

## Supplementary Tables

**Supplementary Table 1: Summary of Adverse Events (Group A)**

Summary of adverse events by 3rd dose vaccine allocation and priming vaccine schedule in Group A

|                                                                      | Prime with ChAd/ChAd   |                     |                    |                         | Prime with BNT/BNT     |                     |                    |                         |
|----------------------------------------------------------------------|------------------------|---------------------|--------------------|-------------------------|------------------------|---------------------|--------------------|-------------------------|
| <b>N=Number of vaccinated participants</b>                           | <b>Control (N=109)</b> | <b>ChAd (N=111)</b> | <b>NVX (N=115)</b> | <b>NVX-half (N=108)</b> | <b>Control (N=118)</b> | <b>ChAd (N=109)</b> | <b>NVX (N=114)</b> | <b>NVX-half (N=112)</b> |
| <b>Number of unique participants with at least one adverse event</b> | 33                     | 23                  | 37                 | 37                      | 30                     | 38                  | 44                 | 41                      |
| <b>Number of adverse events</b>                                      | 51                     | 29                  | 53                 | 57                      | 33                     | 54                  | 58                 | 58                      |
| <b>Severity</b>                                                      |                        |                     |                    |                         |                        |                     |                    |                         |
| Grade 1                                                              | 29 (56.9%)             | 16 (55.2%)          | 32 (60.4%)         | 34 (59.6%)              | 13 (39.4%)             | 36 (66.7%)          | 31 (53.4%)         | 28 (48.3%)              |
| Grade 2                                                              | 20 (39.2%)             | 11 (37.9%)          | 19 (35.8%)         | 20 (35.1%)              | 16 (48.5%)             | 11 (20.4%)          | 22 (37.9%)         | 26 (44.8%)              |
| Grade 3                                                              | 2 (3.9%)               | 1 (3.4%)            | 2 (3.8%)           | 3 (5.3%)                | 3 (9.1%)               | 7 (13.0%)           | 4 (6.9%)           | 2 (3.4%)                |
| Grade 4                                                              | 0 (0.0%)               | 1 (3.4%)            | 0 (0.0%)           | 0 (0.0%)                | 1 (3.0%)               | 0 (0.0%)            | 1 (1.7%)           | 2 (3.4%)                |
| Not reported                                                         | 0 (0.0%)               | 0 (0.0%)            | 0 (0.0%)           | 0 (0.0%)                | 0 (0.0%)               | 0 (0.0%)            | 0 (0.0%)           | 0 (0.0%)                |
| <b>Causality</b>                                                     |                        |                     |                    |                         |                        |                     |                    |                         |
| No relationship                                                      | 17 (33.3%)             | 10 (34.5%)          | 21 (39.6%)         | 23 (40.4%)              | 17 (51.5%)             | 18 (33.3%)          | 20 (34.5%)         | 20 (34.5%)              |
| Unlikely                                                             | 17 (33.3%)             | 11 (37.9%)          | 21 (39.6%)         | 18 (31.6%)              | 12 (36.4%)             | 19 (35.2%)          | 12 (20.7%)         | 25 (43.1%)              |
| Possible                                                             | 11 (21.6%)             | 3 (10.3%)           | 10 (18.9%)         | 9 (15.8%)               | 3 (9.1%)               | 7 (13.0%)           | 20 (34.5%)         | 9 (15.5%)               |
| Probable                                                             | 6 (11.8%)              | 4 (13.8%)           | 1 (1.9%)           | 3 (5.3%)                | 1 (3.0%)               | 8 (14.8%)           | 5 (8.6%)           | 3 (5.2%)                |
| Definite                                                             | 0 (0.0%)               | 1 (3.4%)            | 0 (0.0%)           | 4 (7.0%)                | 0 (0.0%)               | 2 (3.7%)            | 1 (1.7%)           | 1 (1.7%)                |
| Not reported                                                         | 0 (0.0%)               | 0 (0.0%)            | 0 (0.0%)           | 0 (0.0%)                | 0 (0.0%)               | 0 (0.0%)            | 0 (0.0%)           | 0 (0.0%)                |
| <b>System Organ Classes (SOC)</b>                                    |                        |                     |                    |                         |                        |                     |                    |                         |

|                                                                     |           |           |            |           |           |           |           |           |
|---------------------------------------------------------------------|-----------|-----------|------------|-----------|-----------|-----------|-----------|-----------|
| Blood and lymphatic system disorders                                | 3 (5.9%)  | 1 (3.4%)  | 4 (7.5%)   | 1 (1.8%)  | 1 (3.0%)  | 5 (9.3%)  | 0 (0.0%)  | 2 (3.4%)  |
| Cardiac disorders                                                   | 1 (2.0%)  | 0 (0.0%)  | 2 (3.8%)   | 0 (0.0%)  | 2 (6.1%)  | 3 (5.6%)  | 2 (3.4%)  | 2 (3.4%)  |
| Congenital, familial and genetic disorders                          | 0 (0.0%)  | 0 (0.0%)  | 0 (0.0%)   | 0 (0.0%)  | 0 (0.0%)  | 0 (0.0%)  | 1 (1.7%)  | 0 (0.0%)  |
| Ear and labyrinth disorders                                         | 3 (5.9%)  | 2 (6.9%)  | 1 (1.9%)   | 1 (1.8%)  | 0 (0.0%)  | 2 (3.7%)  | 1 (1.7%)  | 3 (5.2%)  |
| Endocrine disorders                                                 | 0 (0.0%)  | 0 (0.0%)  | 0 (0.0%)   | 0 (0.0%)  | 0 (0.0%)  | 0 (0.0%)  | 0 (0.0%)  | 0 (0.0%)  |
| Eye disorders                                                       | 0 (0.0%)  | 0 (0.0%)  | 0 (0.0%)   | 0 (0.0%)  | 0 (0.0%)  | 2 (3.7%)  | 0 (0.0%)  | 1 (1.7%)  |
| Gastrointestinal disorders                                          | 4 (7.8%)  | 1 (3.4%)  | 2 (3.8%)   | 7 (12.3%) | 2 (6.1%)  | 0 (0.0%)  | 3 (5.2%)  | 6 (10.3%) |
| General disorders and administration site conditions                | 6 (11.8%) | 4 (13.8%) | 10 (18.9%) | 6 (10.5%) | 2 (6.1%)  | 6 (11.1%) | 7 (12.1%) | 7 (12.1%) |
| Hepatobiliary disorders                                             | 0 (0.0%)  | 0 (0.0%)  | 0 (0.0%)   | 0 (0.0%)  | 1 (3.0%)  | 0 (0.0%)  | 0 (0.0%)  | 1 (1.7%)  |
| Immune system disorders                                             | 0 (0.0%)  | 0 (0.0%)  | 0 (0.0%)   | 1 (1.8%)  | 1 (3.0%)  | 3 (5.6%)  | 0 (0.0%)  | 0 (0.0%)  |
| Infections and infestations                                         | 6 (11.8%) | 3 (10.3%) | 4 (7.5%)   | 4 (7.0%)  | 3 (9.1%)  | 8 (14.8%) | 4 (6.9%)  | 6 (10.3%) |
| Injury, poisoning and procedural complications                      | 0 (0.0%)  | 1 (3.4%)  | 2 (3.8%)   | 2 (3.5%)  | 1 (3.0%)  | 0 (0.0%)  | 1 (1.7%)  | 2 (3.4%)  |
| Investigations                                                      | 3 (5.9%)  | 1 (3.4%)  | 5 (9.4%)   | 3 (5.3%)  | 3 (9.1%)  | 2 (3.7%)  | 1 (1.7%)  | 2 (3.4%)  |
| Metabolism and nutrition disorders                                  | 1 (2.0%)  | 0 (0.0%)  | 2 (3.8%)   | 0 (0.0%)  | 2 (6.1%)  | 1 (1.9%)  | 4 (6.9%)  | 1 (1.7%)  |
| Musculoskeletal and connective tissue disorders                     | 6 (11.8%) | 3 (10.3%) | 9 (17.0%)  | 7 (12.3%) | 2 (6.1%)  | 5 (9.3%)  | 8 (13.8%) | 7 (12.1%) |
| Neoplasms benign, malignant and unspecified (incl cysts and polyps) | 0 (0.0%)  | 0 (0.0%)  | 0 (0.0%)   | 1 (1.8%)  | 0 (0.0%)  | 1 (1.9%)  | 0 (0.0%)  | 1 (1.7%)  |
| Nervous system disorders                                            | 8 (15.7%) | 1 (3.4%)  | 3 (5.7%)   | 8 (14.0%) | 6 (18.2%) | 2 (3.7%)  | 5 (8.6%)  | 5 (8.6%)  |

|                                                 |          |           |          |           |          |          |           |           |
|-------------------------------------------------|----------|-----------|----------|-----------|----------|----------|-----------|-----------|
| Pregnancy, puerperium and perinatal conditions  | 0 (0.0%) | 0 (0.0%)  | 0 (0.0%) | 0 (0.0%)  | 0 (0.0%) | 0 (0.0%) | 0 (0.0%)  | 0 (0.0%)  |
| Product issues                                  | 0 (0.0%) | 0 (0.0%)  | 0 (0.0%) | 0 (0.0%)  | 0 (0.0%) | 0 (0.0%) | 0 (0.0%)  | 0 (0.0%)  |
| Psychiatric disorders                           | 0 (0.0%) | 1 (3.4%)  | 0 (0.0%) | 1 (1.8%)  | 0 (0.0%) | 3 (5.6%) | 2 (3.4%)  | 0 (0.0%)  |
| Renal and urinary disorders                     | 1 (2.0%) | 0 (0.0%)  | 1 (1.9%) | 1 (1.8%)  | 2 (6.1%) | 1 (1.9%) | 1 (1.7%)  | 1 (1.7%)  |
| Reproductive system and breast disorders        | 1 (2.0%) | 2 (6.9%)  | 0 (0.0%) | 1 (1.8%)  | 0 (0.0%) | 3 (5.6%) | 1 (1.7%)  | 0 (0.0%)  |
| Respiratory, thoracic and mediastinal disorders | 3 (5.9%) | 6 (20.7%) | 2 (3.8%) | 6 (10.5%) | 3 (9.1%) | 4 (7.4%) | 9 (15.5%) | 2 (3.4%)  |
| Skin and subcutaneous tissue disorders          | 1 (2.0%) | 2 (6.9%)  | 3 (5.7%) | 5 (8.8%)  | 0 (0.0%) | 2 (3.7%) | 5 (8.6%)  | 6 (10.3%) |
| Social circumstances                            | 0 (0.0%) | 0 (0.0%)  | 0 (0.0%) | 0 (0.0%)  | 0 (0.0%) | 0 (0.0%) | 0 (0.0%)  | 0 (0.0%)  |
| Surgical and medical procedures                 | 1 (2.0%) | 0 (0.0%)  | 2 (3.8%) | 1 (1.8%)  | 0 (0.0%) | 0 (0.0%) | 0 (0.0%)  | 1 (1.7%)  |
| Vascular disorders                              | 3 (5.9%) | 1 (3.4%)  | 1 (1.9%) | 1 (1.8%)  | 2 (6.1%) | 1 (1.9%) | 3 (5.2%)  | 2 (3.4%)  |
| <b>Menstrual disorder</b>                       |          |           |          |           |          |          |           |           |
| Yes                                             | 0 (0.0%) | 1 (3.4%)  | 0 (0.0%) | 1 (1.8%)  | 0 (0.0%) | 2 (3.7%) | 0 (0.0%)  | 0 (0.0%)  |

\* Data are N (%) unless otherwise indicated. Control =quadrivalent meningococcal conjugate vaccine; ChAd=ChAdOx1 nCoV-19 vaccine, Oxford–AstraZeneca; BNT=BNT162b2 vaccine (Pfizer–BioNTech); NVX=NVX-CoV2373 vaccine, Novavax; NVX half=half dose of NVX-CoV2373 vaccine.

**Supplementary Table 2: Summary of Adverse Events (Group B)**

**Summary of adverse events by 3rd dose vaccine allocation and priming vaccine schedule in Group B**

|                                                                      | Prime with ChAd/ChAd   |                    |                    |                         |                     | Prime with BNT/BNT     |                    |                    |                         |                     |
|----------------------------------------------------------------------|------------------------|--------------------|--------------------|-------------------------|---------------------|------------------------|--------------------|--------------------|-------------------------|---------------------|
| <b>N=Number of vaccinated participants</b>                           | <b>Control (N=105)</b> | <b>BNT (N=106)</b> | <b>VLA (N=109)</b> | <b>VLA-half (N=111)</b> | <b>Ad26 (N=108)</b> | <b>Control (N=109)</b> | <b>BNT (N=109)</b> | <b>VLA (N=110)</b> | <b>VLA-half (N=110)</b> | <b>Ad26 (N=106)</b> |
| <b>Number of unique participants with at least one adverse event</b> | 26                     | 46                 | 46                 | 39                      | 44                  | 33                     | 32                 | 36                 | 35                      | 35                  |
| <b>Number of adverse events</b>                                      | 37                     | 57                 | 61                 | 51                      | 68                  | 41                     | 53                 | 48                 | 48                      | 48                  |
| <b>Severity</b>                                                      |                        |                    |                    |                         |                     |                        |                    |                    |                         |                     |
| Grade 1                                                              | 18 (48.6%)             | 25 (43.9%)         | 32 (52.5%)         | 37 (72.5%)              | 35 (51.5%)          | 28 (68.3%)             | 33 (62.3%)         | 36 (75.0%)         | 28 (58.3%)              | 31 (64.6%)          |
| Grade 2                                                              | 15 (40.5%)             | 25 (43.9%)         | 20 (32.8%)         | 12 (23.5%)              | 24 (35.3%)          | 12 (29.3%)             | 17 (32.1%)         | 9 (18.8%)          | 11 (22.9%)              | 13 (27.1%)          |
| Grade 3                                                              | 3 (8.1%)               | 7 (12.3%)          | 6 (9.8%)           | 2 (3.9%)                | 8 (11.8%)           | 1 (2.4%)               | 2 (3.8%)           | 3 (6.2%)           | 8 (16.7%)               | 4 (8.3%)            |
| Grade 4                                                              | 1 (2.7%)               | 0 (0.0%)           | 3 (4.9%)           | 0 (0.0%)                | 1 (1.5%)            | 0 (0.0%)               | 1 (1.9%)           | 0 (0.0%)           | 1 (2.1%)                | 0 (0.0%)            |
| Not reported                                                         | 0 (0.0%)               | 0 (0.0%)           | 0 (0.0%)           | 0 (0.0%)                | 0 (0.0%)            | 0 (0.0%)               | 0 (0.0%)           | 0 (0.0%)           | 0 (0.0%)                | 0 (0.0%)            |
| <b>Causality</b>                                                     |                        |                    |                    |                         |                     |                        |                    |                    |                         |                     |
| No relationship                                                      | 14 (37.8%)             | 26 (45.6%)         | 29 (47.5%)         | 23 (45.1%)              | 28 (41.2%)          | 19 (46.3%)             | 13 (24.5%)         | 18 (37.5%)         | 21 (43.8%)              | 17 (35.4%)          |
| Unlikely                                                             | 16 (43.2%)             | 12 (21.1%)         | 15 (24.6%)         | 13 (25.5%)              | 15 (22.1%)          | 10 (24.4%)             | 10 (18.9%)         | 17 (35.4%)         | 10 (20.8%)              | 16 (33.3%)          |
| Possible                                                             | 3 (8.1%)               | 12 (21.1%)         | 13 (21.3%)         | 6 (11.8%)               | 16 (23.5%)          | 5 (12.2%)              | 16 (30.2%)         | 10 (20.8%)         | 11 (22.9%)              | 4 (8.3%)            |
| Probable                                                             | 3 (8.1%)               | 7 (12.3%)          | 4 (6.6%)           | 6 (11.8%)               | 7 (10.3%)           | 6 (14.6%)              | 8 (15.1%)          | 2 (4.2%)           | 5 (10.4%)               | 9 (18.8%)           |
| Definite                                                             | 1 (2.7%)               | 0 (0.0%)           | 0 (0.0%)           | 3 (5.9%)                | 2 (2.9%)            | 1 (2.4%)               | 6 (11.3%)          | 1 (2.1%)           | 1 (2.1%)                | 2 (4.2%)            |
| Not reported                                                         | 0 (0.0%)               | 0 (0.0%)           | 0 (0.0%)           | 0 (0.0%)                | 0 (0.0%)            | 0 (0.0%)               | 0 (0.0%)           | 0 (0.0%)           | 0 (0.0%)                | 0 (0.0%)            |
| <b>System Organ Classes (SOC)</b>                                    |                        |                    |                    |                         |                     |                        |                    |                    |                         |                     |

|                                                                     |           |            |           |           |           |           |            |           |           |           |
|---------------------------------------------------------------------|-----------|------------|-----------|-----------|-----------|-----------|------------|-----------|-----------|-----------|
| Blood and lymphatic system disorders                                | 0 (0.0%)  | 2 (3.5%)   | 4 (6.6%)  | 0 (0.0%)  | 0 (0.0%)  | 2 (4.9%)  | 5 (9.4%)   | 1 (2.1%)  | 1 (2.1%)  | 1 (2.1%)  |
| Cardiac disorders                                                   | 1 (2.7%)  | 4 (7.0%)   | 4 (6.6%)  | 0 (0.0%)  | 1 (1.5%)  | 1 (2.4%)  | 1 (1.9%)   | 1 (2.1%)  | 1 (2.1%)  | 1 (2.1%)  |
| Congenital, familial and genetic disorders                          | 0 (0.0%)  | 0 (0.0%)   | 1 (1.6%)  | 0 (0.0%)  | 0 (0.0%)  | 0 (0.0%)  | 0 (0.0%)   | 0 (0.0%)  | 0 (0.0%)  | 0 (0.0%)  |
| Ear and labyrinth disorders                                         | 0 (0.0%)  | 0 (0.0%)   | 2 (3.3%)  | 1 (2.0%)  | 0 (0.0%)  | 0 (0.0%)  | 2 (3.8%)   | 3 (6.2%)  | 1 (2.1%)  | 0 (0.0%)  |
| Endocrine disorders                                                 | 0 (0.0%)  | 0 (0.0%)   | 0 (0.0%)  | 0 (0.0%)  | 0 (0.0%)  | 0 (0.0%)  | 0 (0.0%)   | 0 (0.0%)  | 1 (2.1%)  | 0 (0.0%)  |
| Eye disorders                                                       | 2 (5.4%)  | 0 (0.0%)   | 0 (0.0%)  | 0 (0.0%)  | 0 (0.0%)  | 1 (2.4%)  | 0 (0.0%)   | 0 (0.0%)  | 0 (0.0%)  | 0 (0.0%)  |
| Gastrointestinal disorders                                          | 3 (8.1%)  | 5 (8.8%)   | 4 (6.6%)  | 6 (11.8%) | 6 (8.8%)  | 5 (12.2%) | 5 (9.4%)   | 3 (6.2%)  | 3 (6.2%)  | 3 (6.2%)  |
| General disorders and administration site conditions                | 3 (8.1%)  | 4 (7.0%)   | 4 (6.6%)  | 7 (13.7%) | 7 (10.3%) | 4 (9.8%)  | 10 (18.9%) | 6 (12.5%) | 7 (14.6%) | 4 (8.3%)  |
| Hepatobiliary disorders                                             | 0 (0.0%)  | 0 (0.0%)   | 1 (1.6%)  | 0 (0.0%)  | 1 (1.5%)  | 0 (0.0%)  | 1 (1.9%)   | 0 (0.0%)  | 0 (0.0%)  | 0 (0.0%)  |
| Immune system disorders                                             | 0 (0.0%)  | 1 (1.8%)   | 1 (1.6%)  | 0 (0.0%)  | 2 (2.9%)  | 0 (0.0%)  | 0 (0.0%)   | 1 (2.1%)  | 2 (4.2%)  | 2 (4.2%)  |
| Infections and infestations                                         | 3 (8.1%)  | 6 (10.5%)  | 6 (9.8%)  | 7 (13.7%) | 11(16.2%) | 1 (2.4%)  | 4 (7.5%)   | 5 (10.4%) | 3 (6.2%)  | 4 (8.3%)  |
| Injury, poisoning and procedural complications                      | 1 (2.7%)  | 0 (0.0%)   | 0 (0.0%)  | 4 (7.8%)  | 0 (0.0%)  | 2 (4.9%)  | 0 (0.0%)   | 2 (4.2%)  | 0 (0.0%)  | 1 (2.1%)  |
| Investigations                                                      | 5 (13.5%) | 2 (3.5%)   | 6 (9.8%)  | 3 (5.9%)  | 6 (8.8%)  | 4 (9.8%)  | 0 (0.0%)   | 5 (10.4%) | 1 (2.1%)  | 1 (2.1%)  |
| Metabolism and nutrition disorders                                  | 2 (5.4%)  | 0 (0.0%)   | 2 (3.3%)  | 1 (2.0%)  | 1 (1.5%)  | 1 (2.4%)  | 2 (3.8%)   | 0 (0.0%)  | 2 (4.2%)  | 2 (4.2%)  |
| Musculoskeletal and connective tissue disorders                     | 6 (16.2%) | 13 (22.8%) | 7 (11.5%) | 7 (13.7%) | 8 (11.8%) | 4 (9.8%)  | 7 (13.2%)  | 6 (12.5%) | 8 (16.7%) | 6 (12.5%) |
| Neoplasms benign, malignant and unspecified (incl cysts and polyps) | 0 (0.0%)  | 2 (3.5%)   | 0 (0.0%)  | 0 (0.0%)  | 0 (0.0%)  | 1 (2.4%)  | 0 (0.0%)   | 0 (0.0%)  | 1 (2.1%)  | 0 (0.0%)  |
| Nervous system disorders                                            | 6 (16.2%) | 6 (10.5%)  | 4 (6.6%)  | 8 (15.7%) | 7 (10.3%) | 3 (7.3%)  | 5 (9.4%)   | 6 (12.5%) | 6 (12.5%) | 6 (12.5%) |

|                                                 |          |          |          |          |          |           |          |          |           |           |
|-------------------------------------------------|----------|----------|----------|----------|----------|-----------|----------|----------|-----------|-----------|
| Pregnancy, puerperium and perinatal conditions  | 0 (0.0%) | 0 (0.0%) | 0 (0.0%) | 0 (0.0%) | 0 (0.0%) | 0 (0.0%)  | 0 (0.0%) | 0 (0.0%) | 0 (0.0%)  | 0 (0.0%)  |
| Product issues                                  | 0 (0.0%) | 0 (0.0%) | 0 (0.0%) | 0 (0.0%) | 0 (0.0%) | 0 (0.0%)  | 0 (0.0%) | 0 (0.0%) | 0 (0.0%)  | 0 (0.0%)  |
| Psychiatric disorders                           | 0 (0.0%) | 1 (1.8%) | 0 (0.0%) | 1 (2.0%) | 4 (5.9%) | 0 (0.0%)  | 0 (0.0%) | 0 (0.0%) | 1 (2.1%)  | 2 (4.2%)  |
| Renal and urinary disorders                     | 0 (0.0%) | 0 (0.0%) | 2 (3.3%) | 1 (2.0%) | 3 (4.4%) | 1 (2.4%)  | 1 (1.9%) | 1 (2.1%) | 0 (0.0%)  | 2 (4.2%)  |
| Reproductive system and breast disorders        | 2 (5.4%) | 1 (1.8%) | 2 (3.3%) | 1 (2.0%) | 1 (1.5%) | 0 (0.0%)  | 2 (3.8%) | 2 (4.2%) | 0 (0.0%)  | 1 (2.1%)  |
| Respiratory, thoracic and mediastinal disorders | 2 (5.4%) | 1 (1.8%) | 2 (3.3%) | 2 (3.9%) | 2 (2.9%) | 7 (17.1%) | 3 (5.7%) | 2 (4.2%) | 5 (10.4%) | 5 (10.4%) |
| Skin and subcutaneous tissue disorders          | 1 (2.7%) | 4 (7.0%) | 5 (8.2%) | 2 (3.9%) | 2 (2.9%) | 1 (2.4%)  | 4 (7.5%) | 1 (2.1%) | 3 (6.2%)  | 3 (6.2%)  |
| Social circumstances                            | 0 (0.0%) | 0 (0.0%) | 0 (0.0%) | 0 (0.0%) | 0 (0.0%) | 0 (0.0%)  | 0 (0.0%) | 0 (0.0%) | 0 (0.0%)  | 0 (0.0%)  |
| Surgical and medical procedures                 | 0 (0.0%) | 1 (1.8%) | 0 (0.0%) | 0 (0.0%) | 1 (1.5%) | 1 (2.4%)  | 0 (0.0%) | 1 (2.1%) | 0 (0.0%)  | 1 (2.1%)  |
| Vascular disorders                              | 0 (0.0%) | 4 (7.0%) | 4 (6.6%) | 0 (0.0%) | 5 (7.4%) | 2 (4.9%)  | 1 (1.9%) | 2 (4.2%) | 2 (4.2%)  | 3 (6.2%)  |
| <b>Menstrual disorder</b>                       |          |          |          |          |          |           |          |          |           |           |
| Yes                                             | 0 (0.0%) | 0 (0.0%) | 1 (1.6%) | 0 (0.0%) | 1 (1.5%) | 0 (0.0%)  | 2 (3.8%) | 1 (2.1%) | 0 (0.0%)  | 1 (2.1%)  |

\* Data are N (%) unless otherwise indicated. Control =quadrivalent meningococcal conjugate vaccine; ChAd=ChAdOx1 nCoV-19 vaccine, Oxford–AstraZeneca; BNT=BNT162b2 vaccine (Pfizer–BioNTech); VLA=VLA2001 vaccine, Valneva; VLA half=half dose of VLA2001 vaccine; Ad26=Ad26.COV2.S vaccine, Janssen.



**Supplementary Table 3: Summary of Adverse Events (Group C)**

**Summary of adverse events by 3rd dose vaccine allocation and priming vaccine schedule in Group C**

|                                                                      | Prime with ChAd/ChAd   |                         |                      |                    | Prime with BNT/BNT     |                         |                      |                    |
|----------------------------------------------------------------------|------------------------|-------------------------|----------------------|--------------------|------------------------|-------------------------|----------------------|--------------------|
| <b>N=Number of vaccinated participants</b>                           | <b>Control (N=114)</b> | <b>BNT-half (N=116)</b> | <b>m1273 (N=112)</b> | <b>CVn (N=119)</b> | <b>Control (N=112)</b> | <b>BNT-half (N=110)</b> | <b>m1273 (N=110)</b> | <b>CVn (N=106)</b> |
| <b>Number of unique participants with at least one adverse event</b> | 33                     | 26                      | 36                   | 42                 | 27                     | 30                      | 31                   | 32                 |
| <b>Number of adverse events</b>                                      | 46                     | 31                      | 69                   | 86                 | 36                     | 42                      | 50                   | 41                 |
| <b>Severity</b>                                                      |                        |                         |                      |                    |                        |                         |                      |                    |
| Grade 1                                                              | 30 (65.2%)             | 18 (58.1%)              | 49 (71.0%)           | 56 (65.1%)         | 19 (52.8%)             | 32 (76.2%)              | 37 (74.0%)           | 30 (73.2%)         |
| Grade 2                                                              | 12 (26.1%)             | 12 (38.7%)              | 17 (24.6%)           | 25 (29.1%)         | 15 (41.7%)             | 7 (16.7%)               | 10 (20.0%)           | 9 (22.0%)          |
| Grade 3                                                              | 4 (8.7%)               | 1 (3.2%)                | 2 (2.9%)             | 4 (4.7%)           | 2 (5.6%)               | 3 (7.1%)                | 3 (6.0%)             | 1 (2.4%)           |
| Grade 4                                                              | 0 (0.0%)               | 0 (0.0%)                | 1 (1.4%)             | 0 (0.0%)           | 0 (0.0%)               | 0 (0.0%)                | 0 (0.0%)             | 1 (2.4%)           |
| Not reported                                                         | 0 (0.0%)               | 0 (0.0%)                | 0 (0.0%)             | 1 (1.2%)           | 0 (0.0%)               | 0 (0.0%)                | 0 (0.0%)             | 0 (0.0%)           |
| <b>Causality</b>                                                     |                        |                         |                      |                    |                        |                         |                      |                    |
| No relationship                                                      | 8 (17.4%)              | 5 (16.1%)               | 11 (15.9%)           | 11 (12.8%)         | 9 (25.0%)              | 7 (16.7%)               | 7 (14.0%)            | 8 (19.5%)          |
| Unlikely                                                             | 18 (39.1%)             | 10 (32.3%)              | 13 (18.8%)           | 20 (23.3%)         | 7 (19.4%)              | 12 (28.6%)              | 18 (36.0%)           | 15 (36.6%)         |
| Possible                                                             | 15 (32.6%)             | 12 (38.7%)              | 28 (40.6%)           | 46 (53.5%)         | 17 (47.2%)             | 10 (23.8%)              | 9 (18.0%)            | 14 (34.1%)         |
| Probable                                                             | 4 (8.7%)               | 4 (12.9%)               | 15 (21.7%)           | 9 (10.5%)          | 3 (8.3%)               | 12 (28.6%)              | 16 (32.0%)           | 3 (7.3%)           |
| Definite                                                             | 1 (2.2%)               | 0 (0.0%)                | 1 (1.4%)             | 0 (0.0%)           | 0 (0.0%)               | 1 (2.4%)                | 0 (0.0%)             | 1 (2.4%)           |
| Not reported                                                         | 0 (0.0%)               | 0 (0.0%)                | 1 (1.4%)             | 0 (0.0%)           | 0 (0.0%)               | 0 (0.0%)                | 0 (0.0%)             | 0 (0.0%)           |
| <b>System Organ Classes (SOC)</b>                                    |                        |                         |                      |                    |                        |                         |                      |                    |

|                                                                     |            |           |            |            |           |            |           |           |
|---------------------------------------------------------------------|------------|-----------|------------|------------|-----------|------------|-----------|-----------|
| Blood and lymphatic system disorders                                | 0 (0.0%)   | 3 (9.7%)  | 0 (0.0%)   | 1 (1.2%)   | 1 (2.8%)  | 4 (9.5%)   | 4 (8.0%)  | 2 (4.9%)  |
| Cardiac disorders                                                   | 0 (0.0%)   | 0 (0.0%)  | 3 (4.3%)   | 1 (1.2%)   | 0 (0.0%)  | 0 (0.0%)   | 0 (0.0%)  | 1 (2.4%)  |
| Congenital, familial and genetic disorders                          | 0 (0.0%)   | 0 (0.0%)  | 0 (0.0%)   | 0 (0.0%)   | 0 (0.0%)  | 0 (0.0%)   | 0 (0.0%)  | 0 (0.0%)  |
| Ear and labyrinth disorders                                         | 1 (2.2%)   | 0 (0.0%)  | 0 (0.0%)   | 0 (0.0%)   | 0 (0.0%)  | 0 (0.0%)   | 0 (0.0%)  | 1 (2.4%)  |
| Endocrine disorders                                                 | 0 (0.0%)   | 0 (0.0%)  | 0 (0.0%)   | 0 (0.0%)   | 0 (0.0%)  | 0 (0.0%)   | 0 (0.0%)  | 0 (0.0%)  |
| Eye disorders                                                       | 1 (2.2%)   | 0 (0.0%)  | 3 (4.3%)   | 2 (2.3%)   | 0 (0.0%)  | 0 (0.0%)   | 1 (2.0%)  | 0 (0.0%)  |
| Gastrointestinal disorders                                          | 1 (2.2%)   | 3 (9.7%)  | 6 (8.7%)   | 11 (12.8%) | 3 (8.3%)  | 2 (4.8%)   | 4 (8.0%)  | 1 (2.4%)  |
| General disorders and administration site conditions                | 6 (13.0%)  | 5 (16.1%) | 24 (34.8%) | 26 (30.2%) | 9 (25.0%) | 8 (19.0%)  | 9 (18.0%) | 8 (19.5%) |
| Hepatobiliary disorders                                             | 0 (0.0%)   | 0 (0.0%)  | 0 (0.0%)   | 0 (0.0%)   | 0 (0.0%)  | 0 (0.0%)   | 0 (0.0%)  | 0 (0.0%)  |
| Immune system disorders                                             | 0 (0.0%)   | 0 (0.0%)  | 0 (0.0%)   | 0 (0.0%)   | 0 (0.0%)  | 3 (7.1%)   | 1 (2.0%)  | 1 (2.4%)  |
| Infections and infestations                                         | 3 (6.5%)   | 3 (9.7%)  | 5 (7.2%)   | 5 (5.8%)   | 5 (13.9%) | 1 (2.4%)   | 1 (2.0%)  | 4 (9.8%)  |
| Injury, poisoning and procedural complications                      | 0 (0.0%)   | 0 (0.0%)  | 0 (0.0%)   | 1 (1.2%)   | 1 (2.8%)  | 1 (2.4%)   | 1 (2.0%)  | 1 (2.4%)  |
| Investigations                                                      | 0 (0.0%)   | 0 (0.0%)  | 0 (0.0%)   | 1 (1.2%)   | 0 (0.0%)  | 1 (2.4%)   | 0 (0.0%)  | 2 (4.9%)  |
| Metabolism and nutrition disorders                                  | 0 (0.0%)   | 0 (0.0%)  | 0 (0.0%)   | 2 (2.3%)   | 0 (0.0%)  | 1 (2.4%)   | 2 (4.0%)  | 2 (4.9%)  |
| Musculoskeletal and connective tissue disorders                     | 13 (28.3%) | 7 (22.6%) | 11 (15.9%) | 8 (9.3%)   | 2 (5.6%)  | 12 (28.6%) | 7 (14.0%) | 6 (14.6%) |
| Neoplasms benign, malignant and unspecified (incl cysts and polyps) | 0 (0.0%)   | 0 (0.0%)  | 0 (0.0%)   | 0 (0.0%)   | 0 (0.0%)  | 0 (0.0%)   | 0 (0.0%)  | 0 (0.0%)  |
| Nervous system disorders                                            | 9 (19.6%)  | 5 (16.1%) | 7 (10.1%)  | 8 (9.3%)   | 6 (16.7%) | 2 (4.8%)   | 8 (16.0%) | 4 (9.8%)  |

|                                                 |          |          |          |          |           |          |          |          |
|-------------------------------------------------|----------|----------|----------|----------|-----------|----------|----------|----------|
| Pregnancy, puerperium and perinatal conditions  | 0 (0.0%) | 0 (0.0%) | 0 (0.0%) | 0 (0.0%) | 0 (0.0%)  | 0 (0.0%) | 0 (0.0%) | 0 (0.0%) |
| Product issues                                  | 0 (0.0%) | 0 (0.0%) | 0 (0.0%) | 0 (0.0%) | 0 (0.0%)  | 0 (0.0%) | 0 (0.0%) | 0 (0.0%) |
| Psychiatric disorders                           | 2 (4.3%) | 1 (3.2%) | 3 (4.3%) | 1 (1.2%) | 1 (2.8%)  | 0 (0.0%) | 2 (4.0%) | 0 (0.0%) |
| Renal and urinary disorders                     | 3 (6.5%) | 0 (0.0%) | 1 (1.4%) | 2 (2.3%) | 4 (11.1%) | 3 (7.1%) | 0 (0.0%) | 0 (0.0%) |
| Reproductive system and breast disorders        | 0 (0.0%) | 1 (3.2%) | 1 (1.4%) | 4 (4.7%) | 1 (2.8%)  | 2 (4.8%) | 1 (2.0%) | 0 (0.0%) |
| Respiratory, thoracic and mediastinal disorders | 3 (6.5%) | 1 (3.2%) | 2 (2.9%) | 5 (5.8%) | 2 (5.6%)  | 1 (2.4%) | 4 (8.0%) | 2 (4.9%) |
| Skin and subcutaneous tissue disorders          | 4 (8.7%) | 1 (3.2%) | 3 (4.3%) | 3 (3.5%) | 0 (0.0%)  | 0 (0.0%) | 1 (2.0%) | 2 (4.9%) |
| Social circumstances                            | 0 (0.0%) | 0 (0.0%) | 0 (0.0%) | 0 (0.0%) | 0 (0.0%)  | 0 (0.0%) | 0 (0.0%) | 0 (0.0%) |
| Surgical and medical procedures                 | 0 (0.0%) | 0 (0.0%) | 0 (0.0%) | 0 (0.0%) | 0 (0.0%)  | 0 (0.0%) | 1 (2.0%) | 1 (2.4%) |
| Vascular disorders                              | 0 (0.0%) | 1 (3.2%) | 0 (0.0%) | 5 (5.8%) | 1 (2.8%)  | 1 (2.4%) | 3 (6.0%) | 3 (7.3%) |
| <b>Menstrual disorder</b>                       |          |          |          |          |           |          |          |          |
| Yes                                             | 0 (0.0%) | 0 (0.0%) | 0 (0.0%) | 3 (3.5%) | 0 (0.0%)  | 0 (0.0%) | 0 (0.0%) | 0 (0.0%) |

\* Data are N (%) unless otherwise indicated. Control =quadrivalent meningococcal conjugate vaccine; ChAd=ChAdOx1 nCoV-19 vaccine, Oxford–AstraZeneca; BNT=BNT162b2 vaccine (Pfizer–BioNTech); BNT half=half dose of BNT162b2 vaccine; m1273=mRNA1273 vaccine, Moderna; CVn=CVnCoV vaccine, Curevac.

**Supplementary Table 4: Adverse Events of Special Interest**

**Adverse events of special interest in all study arms (Excluding SAEs and COVID-19 cases in immediate 14 days after 3<sup>rd</sup> dose)**

| <b>Study arm</b> | <b>Site</b>                            | <b>Days to onset from boost</b> | <b>MedDRA Preferred Term</b> | <b>MedDRA System Order Class</b>     | <b>Severity</b> | <b>Causality assessment</b> |
|------------------|----------------------------------------|---------------------------------|------------------------------|--------------------------------------|-----------------|-----------------------------|
| Ad26             | University Hospital Southampton NHS FT | 19                              | Acute kidney injury          | Renal and urinary disorders          | Grade3          | Unlikely                    |
| VLA              | University Hospital Southampton NHS FT | 35                              | Ventricular extrasystoles    | Cardiac disorders                    | Grade1          | Unlikely                    |
| VLA              | Guys and St Thomas' NHS FT             | 28                              | Acute kidney injury          | Renal and urinary disorders          | Grade1          | Possible                    |
| BNT              | Guys and St Thomas' NHS FT             | 0                               | Thrombocytopenia             | Blood and lymphatic system disorders | Grade3          | No relationship             |
| Ad26             | Guys and St Thomas' NHS FT             | 5                               | Epistaxis                    | Vascular disorders                   | Grade3          | Unlikely                    |
| Ad26             | Guys and St Thomas' NHS FT             | 21                              | Paraesthesia                 | Nervous system disorders             | Grade2          | Possible                    |
| VLA              | Leeds Teaching Hospitals NHS Trust     | 12                              | COVID-19                     | Infections and infestations          | Grade2          | No relationship             |
| Control-group B  | Leeds Teaching Hospitals NHS Trust     | 21                              | Acute kidney injury          | Renal and urinary disorders          | Grade2          | No relationship             |
| VLA-half         | Leeds Teaching Hospitals NHS Trust     | 12                              | COVID-19                     | Infections and infestations          | Grade2          | No relationship             |
| m1273            | Royal Devon and Exeter NHS FT          | 23                              | Acute kidney injury          | Renal and urinary disorders          | Grade1          | Unlikely                    |
| Control-group C  | Royal Devon and Exeter NHS FT          | 29                              | Acute kidney injury          | Renal and urinary disorders          | Grade3          | Unlikely                    |

|                 |                                                    |    |                     |                             |        |                 |
|-----------------|----------------------------------------------------|----|---------------------|-----------------------------|--------|-----------------|
| CVn             | University Hospitals Birmingham NHS FT             | 4  | COVID-19            | Infections and infestations | Grade1 | No relationship |
| BNT-half        | University Hospitals Birmingham NHS FT             | 6  | COVID-19            | Infections and infestations | Grade1 | No relationship |
| Control-group C | University Hospitals Birmingham NHS FT             | 2  | COVID-19            | Infections and infestations | Grade1 | No relationship |
| Control-group A | University Hospitals of Leicester NHS FT           | 0  | Pericarditis        | Cardiac disorders           | Grade1 | Possible        |
| Control-group C | London North West University Healthcare NHS Trust  | 29 | Acute kidney injury | Renal and urinary disorders | Grade3 | Unlikely        |
| BNT-half        | London North West University Healthcare NHS Trust  | 28 | Acute kidney injury | Renal and urinary disorders | Grade3 | Possible        |
| Control-group C | London North West University Healthcare NHS Trust  | 28 | Acute kidney injury | Renal and urinary disorders | Grade3 | Unlikely        |
| CVn             | Brighton and Sussex University Hospitals NHS Trust | 1  | COVID-19            | Infections and infestations | Grade2 | No relationship |
| Control-group C | Brighton and Sussex University Hospitals NHS Trust | 26 | Acute kidney injury | Renal and urinary disorders | Grade2 | Possible        |

**Supplementary Table 5: COVID-19 cases**

**Adverse events of special interest - COVID-19 cases, by study arm**

| <b>Sites</b>                               | <b>Days to onset post 3<sup>rd</sup> dose</b> | <b>Arm</b>       |
|--------------------------------------------|-----------------------------------------------|------------------|
| Bradford Teaching Hospitals NHS FT         | 39                                            | Control- group A |
| Public Health Wales                        | 65                                            | Control- group A |
| Bradford Teaching Hospitals NHS FT         | 51                                            | ChAd             |
| University Hospitals of Leicester NHS FT   | 28                                            | NVX              |
| University College London Hospitals NHS FT | 57                                            | NVX-half         |
| Public Health Wales                        | 30                                            | NVX-half         |
| University Hospital Southampton NHS FT     | 50                                            | Control- group B |
| University of Oxford                       | 66                                            | Control- group B |
| University of Oxford                       | 28                                            | Control- group B |
| Guys and St Thomas' NHS FT                 | 60                                            | Control- group B |
| Guys and St Thomas' NHS FT                 | 52                                            | VLA              |
| NHS Greater Glasgow and Clyde              | 66                                            | VLA              |
| Cambridge University Hospitals NHS FT      | 18                                            | VLA              |
| Cambridge University Hospitals NHS FT      | 34                                            | VLA              |
| University Hospital Southampton NHS FT     | 17                                            | VLA-half         |
| Guys and St Thomas' NHS FT                 | 28                                            | VLA-half         |
| Leeds Teaching Hospitals NHS Trust         | 25                                            | VLA-half         |
| NHS Greater Glasgow and Clyde              | 37                                            | VLA-half         |
| Cambridge University Hospitals NHS FT      | 59                                            | Ad26             |
| University Hospitals Birmingham NHS FT     | 31                                            | Control- group C |
| Royal Devon and Exeter NHS FT              | 33                                            | Control- group C |

**Supplementary Table 6: Serious Adverse Events**

| <b>Study arm</b> | <b>Site</b>                            | <b>Days to onset from boost</b> | <b>MedDRA Preferred Term</b>        | <b>MedDRA System Order Class</b>         | <b>Severity</b> | <b>Serious adverse event type</b> | <b>Causality assessment</b> |
|------------------|----------------------------------------|---------------------------------|-------------------------------------|------------------------------------------|-----------------|-----------------------------------|-----------------------------|
| Ad26             | University Hospital Southampton NHS FT | 12                              | Cholecystitis                       | Hepatobiliary disorders                  | Grade3          | Hospitalisation                   | Unlikely                    |
| VLA              | University Hospital Southampton NHS FT | 28                              | Liver injury                        | Hepatobiliary disorders                  | Grade4          | An important medical event        | Possible                    |
| Ad26             | University of Oxford                   | 33                              | Cerebrovascular accident            | Nervous system disorders                 | Grade4          | An important medical event        | Possible                    |
| Control-group B  | University of Oxford                   | 15                              | Transient global amnesia            | Nervous system disorders                 | Grade4          | Hospitalisation                   | Unlikely                    |
| Control-group B  | Guys and St Thomas' NHS FT             | 55                              | Breast cancer                       | Reproductive system and breast disorders | Grade3          | An important medical event        | No relationship             |
| VLA              | Leeds Teaching Hospitals NHS Trust     | 19                              | Myocardial infarction               | Cardiac disorders                        | Grade3          | Hospitalisation                   | Possible                    |
| VLA-half         | Leeds Teaching Hospitals NHS Trust     | 0                               | Oesophageal squamous cell carcinoma | Gastrointestinal disorders               | Grade3          | An important medical event        | No relationship             |
| Control-group B  | Leeds Teaching Hospitals NHS Trust     | 20                              | Cerebrovascular accident            | Nervous system disorders                 | Grade3          | Hospitalisation                   | Unlikely                    |

|                 |                                            |    |                         |                                          |        |                            |                 |
|-----------------|--------------------------------------------|----|-------------------------|------------------------------------------|--------|----------------------------|-----------------|
| VLA             | Leeds Teaching Hospitals NHS Trust         | 46 | Breast cancer           | Reproductive system and breast disorders | Grade3 | An important medical event | No relationship |
| VLA             | NHS Greater Glasgow and Clyde              | 15 | Sinus node dysfunction  | Cardiac disorders                        | Grade4 | Hospitalisation            | Unlikely        |
| BNT             | NHS Greater Glasgow and Clyde              | 16 | Liver injury            | Hepatobiliary disorders                  | Grade4 | Hospitalisation            | Unlikely        |
| ChAd            | Bradford Teaching Hospitals NHS FT         | 24 | Urinary tract infection | Infections and infestations              | Grade4 | Hospitalisation            | No relationship |
| NVX             | Bradford Teaching Hospitals NHS FT         | 58 | Urinary tract infection | Infections and infestations              | Grade3 | An important medical event | No relationship |
| CVn             | Royal Devon and Exeter NHS FT              | 28 | Hyponatraemia           | Metabolism and nutrition disorders       | Grade4 | An important medical event | Unlikely        |
| Control-group A | University College London Hospitals NHS FT | 55 | Abdominal pain          | Gastrointestinal disorders               | Grade2 | Hospitalisation            | No relationship |
| Control-group A | University College London Hospitals NHS FT | 28 | Hyperbilirubinaemia     | Hepatobiliary disorders                  | Grade4 | An important medical event | No relationship |
| VLA             | Cambridge University Hospitals NHS FT      | 49 | Pyelocaliectasis        | Renal and urinary disorders              | Grade3 | Hospitalisation            | No relationship |
| NVX-half        | Dorset Research Hub                        | 31 | Pericarditis            | Cardiac disorders                        | Grade4 | An important medical event | No relationship |



|          |                                                     |    |                            |                                                                     |        |                            |                 |
|----------|-----------------------------------------------------|----|----------------------------|---------------------------------------------------------------------|--------|----------------------------|-----------------|
| ChAd     | Portsmouth Research Hub                             | 4  | Malignant Melanoma         | Neoplasms benign, malignant and unspecified (incl cysts and polyps) | Grade3 | An important medical event | No relationship |
| BNT-half | University Hospitals Birmingham NHS FT              | 37 | Eye haemorrhage            | Vascular disorders                                                  | Grade3 | An important medical event | Possible        |
| NVX      | University Hospitals of Leicester NHS FT            | 13 | Ovarian cancer             | Reproductive system and breast disorders                            | Grade4 | An important medical event | No relationship |
| NVX-half | University Hospitals of Leicester NHS FT            | 51 | Gastrointestinal carcinoma | Neoplasms benign, malignant and unspecified (incl cysts and polyps) | Grade4 | Hospitalisation            | No relationship |
| M1273    | Liverpool University Hospitals NHS Foundation Trust | 0  | Myocardial ischaemia       | Cardiac disorders                                                   | Grade4 | Hospitalisation            | No relationship |
| BNT-half | Liverpool University Hospitals NHS Foundation Trust | 36 | Paraesthesia               | Nervous system disorders                                            | Grade2 | Hospitalisation            | Unlikely        |

\* See protocol for causality assessment guidance

**Supplementary Table 7: Baseline vs Day 28 immunogenicity**

**Summary of immunogenicity at baseline (pre-3rd dose) and fold-rise at 28 days post boost compared with baseline\***

|                                                                  | Prime with ChAd/ChAd          |                               |                               |                               | Prime with BNT/BNT             |                               |                                |                               |
|------------------------------------------------------------------|-------------------------------|-------------------------------|-------------------------------|-------------------------------|--------------------------------|-------------------------------|--------------------------------|-------------------------------|
| <b>Group A</b>                                                   | <b>Control<br/>(N=93)</b>     | <b>ChAd<br/>(N=100)</b>       | <b>NVX<br/>(N=96)</b>         | <b>NVX-half<br/>(N=97)</b>    | <b>Control<br/>(N=111)</b>     | <b>ChAd<br/>(N=98)</b>        | <b>NVX<br/>(N=103)</b>         | <b>NVX-half<br/>(N=99)</b>    |
| SARS-CoV-2 anti-spike IgG, ELU/ml                                |                               |                               |                               |                               |                                |                               |                                |                               |
| D0                                                               | 1024<br>(854,1227)<br>(n=93)  | 956<br>(783,1169)<br>(n=100)  | 1037<br>(863,1247)<br>(n=96)  | 1047<br>(846,1296)<br>(n=97)  | 3437<br>(2832,4172)<br>(n=110) | 3350<br>(2763,4061)<br>(n=98) | 3081<br>(2573,3689)<br>(n=103) | 4442<br>(3712,5314)<br>(n=98) |
| GMFR                                                             | 0.79<br>(0.75,0.83)<br>(n=91) | 2.58<br>(2.16,3.08)<br>(n=99) | 6.70<br>(5.59,8.05)<br>(n=95) | 4.42<br>(3.70,5.29)<br>(n=97) | 0.74<br>(0.71,0.77)<br>(n=110) | 4.06<br>(3.33,4.94)<br>(n=97) | 3.57<br>(2.98,4.27)<br>(n=101) | 1.97<br>(1.66,2.34)<br>(n=97) |
| Pseudotype virus neutralising antibody (WT), NT <sub>50</sub>    |                               |                               |                               |                               |                                |                               |                                |                               |
| D0                                                               | 122<br>(94,158)<br>(n=48)     | 95<br>(75,121)<br>(n=50)      | 123<br>(90,167)<br>(n=48)     | 123<br>(88,171)<br>(n=50)     | 191<br>(144,253)<br>(n=53)     | 181<br>(130,253)<br>(n=49)    | 217<br>(159,296)<br>(n=49)     | 273<br>(208,360)<br>(n=49)    |
| GMFR                                                             | 0.74<br>(0.66,0.84)<br>(n=46) | 1.79<br>(1.48,2.17)<br>(n=49) | 5.16<br>(3.77,7.07)<br>(n=44) | 4.24<br>(3.17,5.67)<br>(n=45) | 0.91<br>(0.82,1.00)<br>(n=53)  | 6.12<br>(4.25,8.80)<br>(n=49) | 3.67<br>(2.75,4.90)<br>(n=45)  | 2.74<br>(1.95,3.84)<br>(n=45) |
| Pseudotype virus neutralising antibody (Delta), NT <sub>50</sub> |                               |                               |                               |                               |                                |                               |                                |                               |
| D0                                                               | 23.6<br>(16.1,34.5)<br>(n=48) | 19.3<br>(14.1,26.6)<br>(n=50) | 26.8<br>(18.8,38.1)<br>(n=48) | 27.1<br>(19.7,37.4)<br>(n=50) | 40.7<br>(29.1,56.9)<br>(n=53)  | 45.9<br>(31.7,66.3)<br>(n=49) | 50.6<br>(37.5,68.3)<br>(n=50)  | 63.3<br>(44.2,90.8)<br>(n=49) |

|                                                                         |                               |                                  |                               |                                |                                |                               |                               |                               |                               |                               |
|-------------------------------------------------------------------------|-------------------------------|----------------------------------|-------------------------------|--------------------------------|--------------------------------|-------------------------------|-------------------------------|-------------------------------|-------------------------------|-------------------------------|
| GMFR                                                                    | 1.04<br>(0.80,1.35)<br>(n=46) | 1.93<br>(1.52,2.46)<br>(n=49)    | 5.64<br>(3.90,8.16)<br>(n=39) | 4.70<br>(3.23,6.82)<br>(n=37)  | 0.91<br>(0.77,1.07)<br>(n=53)  | 5.68<br>(3.78,8.52)<br>(n=49) | 3.72<br>(2.62,5.29)<br>(n=40) | 2.92<br>(1.96,4.36)<br>(n=43) |                               |                               |
| Cellular response (WT),<br>SFC/10 <sup>6</sup> PBMCs                    |                               |                                  |                               |                                |                                |                               |                               |                               |                               |                               |
| DO                                                                      | 41.4<br>(30.0,57.1)<br>(n=47) | 38.7<br>(28.1,53.3)<br>(n=48)    | 24.6<br>(16.4,37.1)<br>(n=47) | 27.2<br>(19.8,37.3)<br>(n=48)  | 38.0<br>(26.5,54.5)<br>(n=53)  | 48.5<br>(33.5,70.0)<br>(n=49) | 35.2<br>(24.0,51.4)<br>(n=49) | 26.1<br>(18.1,37.5)<br>(n=48) |                               |                               |
| GMFR                                                                    | 1.11<br>(0.84,1.47)<br>(n=44) | 1.24<br>(0.98,1.58)<br>(n=46)    | 4.88<br>(3.25,7.35)<br>(n=44) | 3.47<br>(2.61,4.61)<br>(n=46)  | 0.88<br>(0.59,1.31)<br>(n=52)  | 2.11<br>(1.56,2.84)<br>(n=47) | 1.62<br>(1.14,2.28)<br>(n=48) | 1.36<br>(0.98,1.89)<br>(n=47) |                               |                               |
| <b>Group B</b>                                                          | <b>Control<br/>(N=93)</b>     | <b>BNT<br/>(N=95)</b>            | <b>VLA<br/>(N=95)</b>         | <b>VLA-half<br/>(N=107)</b>    | <b>Ad26<br/>(N=101)</b>        | <b>Control<br/>(N=97)</b>     | <b>BNT<br/>(N=96)</b>         | <b>VLA<br/>(N=99)</b>         | <b>VLA-half<br/>(N=98)</b>    | <b>Ad26<br/>(N=89)</b>        |
| SARS-CoV-2 anti-spike<br>IgG, ELU/ml                                    |                               |                                  |                               |                                |                                |                               |                               |                               |                               |                               |
| DO                                                                      | 1162<br>(972,1389)<br>(n=92)  | 1286<br>(1076,1537)<br>(n=94)    | 1303<br>(1062,1598)<br>(n=95) | 1186<br>(982,1432)<br>(n=107)  | 1495<br>(1203,1858)<br>(n=101) | 4283<br>(3608,5083)<br>(n=97) | 4768<br>(3966,5732)<br>(n=96) | 4349<br>(3569,5299)<br>(n=99) | 3902<br>(3275,4649)<br>(n=98) | 4018<br>(3297,4898)<br>(n=89) |
| GMFR                                                                    | 0.67<br>(0.58,0.78)<br>(n=90) | 15.96<br>(13.75,18.53)<br>(n=93) | 1.45<br>(1.31,1.60)<br>(n=93) | 1.22<br>(1.10,1.35)<br>(n=103) | 3.63<br>(3.04,4.33)<br>(n=98)  | 0.73<br>(0.68,0.78)<br>(n=94) | 5.71<br>(4.86,6.72)<br>(n=96) | 0.96<br>(0.84,1.11)<br>(n=98) | 0.95<br>(0.84,1.09)<br>(n=98) | 4.35<br>(3.57,5.30)<br>(n=87) |
| Pseudotype virus neutr<br>alising antibody (WT),<br>NT <sub>50</sub>    |                               |                                  |                               |                                |                                |                               |                               |                               |                               |                               |
| DO                                                                      | 88<br>(71,110)<br>(n=48)      | 101<br>(80,127)<br>(n=49)        | 125<br>(98,160)<br>(n=48)     | 118<br>(92,150)<br>(n=54)      | 142<br>(107,190)<br>(n=54)     | 238<br>(186,305)<br>(n=53)    | 257<br>(195,340)<br>(n=49)    | 283<br>(218,367)<br>(n=48)    | 258<br>(211,314)<br>(n=50)    | 283<br>(203,394)<br>(n=44)    |
| GMFR                                                                    | 0.81<br>(0.72,0.90)<br>(n=48) | 15.40<br>(12.40,19.13)<br>(n=49) | 1.80<br>(1.48,2.20)<br>(n=48) | 1.17<br>(1.03,1.33)<br>(n=51)  | 4.33<br>(3.18,5.89)<br>(n=51)  | 0.82<br>(0.74,0.92)<br>(n=50) | 6.54<br>(5.11,8.37)<br>(n=49) | 1.09<br>(0.91,1.31)<br>(n=44) | 0.92<br>(0.81,1.04)<br>(n=45) | 6.61<br>(4.54,9.61)<br>(n=35) |
| Pseudotype virus neutr<br>alising antibody (Delta),<br>NT <sub>50</sub> |                               |                                  |                               |                                |                                |                               |                               |                               |                               |                               |

|                                                                      |                               |                                  |                                  |                                |                                |                                |                                |                               |                               |                               |
|----------------------------------------------------------------------|-------------------------------|----------------------------------|----------------------------------|--------------------------------|--------------------------------|--------------------------------|--------------------------------|-------------------------------|-------------------------------|-------------------------------|
| DO                                                                   | 20.4<br>(15.0,27.7)<br>(n=49) | 28.4<br>(21.6,37.4)<br>(n=51)    | 24.7<br>(17.9,34.1)<br>(n=48)    | 22.5<br>(17.2,29.4)<br>(n=54)  | 27.3<br>(19.7,37.8)<br>(n=54)  | 77.6<br>(59.8,100.6)<br>(n=53) | 70.9<br>(52.7,95.4)<br>(n=49)  | 70.8<br>(52.1,96.1)<br>(n=47) | 52.8<br>(38.9,71.7)<br>(n=50) | 60.3<br>(42,86.6)<br>(n=45)   |
| GMFR                                                                 | 0.98<br>(0.82,1.17)<br>(n=49) | 11.65<br>(8.56,15.84)<br>(n=51)  | 1.64<br>(1.38,1.94)<br>(n=44)    | 1.27<br>(0.98,1.64)<br>(n=46)  | 5.21<br>(3.92,6.94)<br>(n=49)  | 0.66<br>(0.53,0.82)<br>(n=49)  | 4.89<br>(3.50,6.83)<br>(n=49)  | 1.08<br>(0.89,1.32)<br>(n=45) | 1.04<br>(0.88,1.23)<br>(n=48) | 7.37<br>(5.08,10.7)<br>(n=40) |
| Cellular response (WT),<br>SFC/10 <sup>6</sup> PBMCs                 |                               |                                  |                                  |                                |                                |                                |                                |                               |                               |                               |
| DO                                                                   | 42.4<br>(30.1,59.7)<br>(n=49) | 37.2<br>(25.9,53.4)<br>(n=48)    | 31.6<br>(21.4,46.7)<br>(n=48)    | 35.9<br>(26.2,49.1)<br>(n=54)  | 37.0<br>(27.7,49.4)<br>(n=53)  | 27.8<br>(20.5,37.6)<br>(n=52)  | 29.6<br>(20.9,41.8)<br>(n=51)  | 27.7<br>(19.5,39.2)<br>(n=49) | 33.8<br>(24.5,46.7)<br>(n=51) | 39.0<br>(26.4,57.6)<br>(n=42) |
| GMFR                                                                 | 1.00<br>(0.73,1.39)<br>(n=49) | 3.40<br>(2.31,4.99)<br>(n=48)    | 1.62<br>(1.11,2.35)<br>(n=47)    | 1.52<br>(1.06,2.17)<br>(n=52)  | 2.86<br>(2.15,3.81)<br>(n=53)  | 1.13<br>(0.83,1.55)<br>(n=49)  | 2.77<br>(2.12,3.62)<br>(n=49)  | 1.18<br>(0.88,1.58)<br>(n=49) | 1.12<br>(0.80,1.58)<br>(n=51) | 2.77<br>(1.85,4.15)<br>(n=42) |
| <b>Group C</b>                                                       | <b>Control<br/>(N=102)</b>    | <b>BNT-half<br/>(N=105)</b>      | <b>M1273<br/>(N=98)</b>          | <b>CVn<br/>(N=105)</b>         | <b>Control<br/>(N=100)</b>     | <b>BNT-half<br/>(N=94)</b>     | <b>m1273<br/>(N=92)</b>        | <b>CVn<br/>(N=94)</b>         |                               |                               |
| SARS-CoV-2 anti-spike<br>IgG, ELU/ml                                 |                               |                                  |                                  |                                |                                |                                |                                |                               |                               |                               |
| DO                                                                   | 1117<br>(932,1338)<br>(n=100) | 1348<br>(1104,1647)<br>(n=105)   | 1353<br>(1128,1623)<br>(n=97)    | 999<br>(844,1183)<br>(n=104)   | 4100<br>(3437,4891)<br>(n=100) | 4099<br>(3334,5041)<br>(n=92)  | 3442<br>(2775,4268)<br>(n=92)  | 4192<br>(3529,4979)<br>(n=93) |                               |                               |
| GMFR                                                                 | 0.77<br>(0.70,0.85)<br>(n=99) | 11.79<br>(9.70,14.33)<br>(n=103) | 23.37<br>(20.01,27.30)<br>(n=96) | 4.08<br>(3.45,4.82)<br>(n=102) | 0.74<br>(0.69,0.79)<br>(n=98)  | 5.64<br>(4.63,6.88)<br>(n=90)  | 9.86<br>(8.15,11.93)<br>(n=91) | 1.82<br>(1.59,2.08)<br>(n=90) |                               |                               |
| Pseudotype virus neutr<br>alising antibody (WT),<br>NT <sub>50</sub> |                               |                                  |                                  |                                |                                |                                |                                |                               |                               |                               |
| DO                                                                   | 98<br>(71,136)<br>(n=48)      | 123<br>(89,171)<br>(n=52)        | 117<br>(81,169)<br>(n=45)        | 118<br>(91,153)<br>(n=48)      | 191<br>(146,250)<br>(n=49)     | 238<br>(167,339)<br>(n=47)     | 168<br>(118,237)<br>(n=45)     | 297<br>(236,373)<br>(n=47)    |                               |                               |
| GMFR                                                                 | 0.76<br>(0.57,1.02)<br>(n=47) | 10.43<br>(8.08,13.46)<br>(n=50)  | 22.28<br>(17.16,28.91)<br>(n=44) | 3.34<br>(2.44,4.59)<br>(n=43)  | 0.82<br>(0.68,0.98)<br>(n=47)  | 5.93<br>(4.32,8.14)<br>(n=45)  | 9.27<br>(7.04,12.19)<br>(n=45) | 1.88<br>(1.55,2.28)<br>(n=44) |                               |                               |

|                                                                  |                               |                                |                                  |                               |                               |                               |                                |                                |
|------------------------------------------------------------------|-------------------------------|--------------------------------|----------------------------------|-------------------------------|-------------------------------|-------------------------------|--------------------------------|--------------------------------|
| Pseudotype virus neutralising antibody (Delta), NT <sub>50</sub> |                               |                                |                                  |                               |                               |                               |                                |                                |
| DO                                                               | 21.2<br>(15.3,29.2)<br>(n=48) | 33.0<br>(23.4,46.6)<br>(n=52)  | 28.6<br>(21.1,38.7)<br>(n=45)    | 21.9<br>(16.8,28.5)<br>(n=48) | 56.9<br>(43.5,74.4)<br>(n=49) | 63.7<br>(42.9,94.5)<br>(n=47) | 48.6<br>(34.2,69.0)<br>(n=45)  | 79.1<br>(57.8,108.2)<br>(n=47) |
| GMFR                                                             | 0.71<br>(0.61,0.82)<br>(n=47) | 9.00<br>(7.02,11.55)<br>(n=50) | 19.84<br>(15.19,25.90)<br>(n=43) | 3.14<br>(2.31,4.27)<br>(n=40) | 0.63<br>(0.54,0.73)<br>(n=47) | 5.10<br>(3.66,7.11)<br>(n=44) | 8.08<br>(5.98,10.91)<br>(n=45) | 1.61<br>(1.28,2.04)<br>(n=43)  |
| Cellular response (WT), SFC/10 <sup>6</sup> PBMCs                |                               |                                |                                  |                               |                               |                               |                                |                                |
| DO                                                               | 43.1<br>(29.9,62.3)<br>(n=48) | 48.4<br>(35,66.9)<br>(n=54)    | 47.2<br>(33.4,66.7)<br>(n=44)    | 31.0<br>(22.1,43.5)<br>(n=48) | 38.3<br>(27.4,53.6)<br>(n=48) | 43.3<br>(30.2,62.2)<br>(n=45) | 38.7<br>(26.5,56.5)<br>(n=45)  | 37.7<br>(26.6,53.6)<br>(n=45)  |
| GMFR                                                             | 0.89<br>(0.66,1.19)<br>(n=48) | 2.80<br>(2.17,3.62)<br>(n=52)  | 3.05<br>(2.07,4.48)<br>(n=42)    | 1.57<br>(1.10,2.25)<br>(n=48) | 0.58<br>(0.42,0.80)<br>(n=46) | 1.70<br>(1.20,2.39)<br>(n=43) | 2.90<br>(2.05,4.10)<br>(n=44)  | 1.26<br>(0.93,1.70)<br>(n=43)  |

\* Data shown are geometric mean (95% CI); GMFR=geometric mean of fold rise; Control =quadrivalent meningococcal conjugate vaccine; ChAd=ChAdOx1 nCoV-19 vaccine, Oxford–AstraZeneca; BNT=BNT162b2 vaccine (Pfizer–BioNTech); NVX=NVX-CoV2373 vaccine, Novavax; NVX half=half dose of NVX-CoV2373 vaccine; VLA=VLA2001 vaccine, Valneva; VLA half=half dose of VLA2001 vaccine; Ad26=Ad26.COVS vaccine, Janssen; BNT half=half dose of BNT162b2 vaccine; m1273=mRNA1273 vaccine, Moderna; CVn=CVnCoV vaccine, Curevac.

**Supplementary Table 8: Baseline immunogenicity by Serostatus (anti-nucleocapsid IgG)**

**Summary of immunogenicity at baseline (pre-3rd dose) between seropositive and seronegative participants\***

|                                                                  | Prime with ChAd/ChAd               |                                     | Prime with BNT/BNT                     |                                     |
|------------------------------------------------------------------|------------------------------------|-------------------------------------|----------------------------------------|-------------------------------------|
|                                                                  | Seropositive<br>N=143              | Seronegative<br>N=1303              | Seropositive<br>N=152                  | Seronegative<br>N=1285              |
| SARS-CoV-2 anti-spike IgG,<br>ELU/ml                             | 7519 (95%CI: 6188-9137)<br>[n=140] | 1160 (95%CI: 1100-1224)<br>[n=1294] | 16077 (95%CI: 13992-<br>18473) [n=150] | 3900 (95%CI: 3701-4110)<br>[n=1279] |
| Pseudotype virus neutralising<br>antibody (WT), NT <sub>50</sub> | 1088 (95%CI: 786-1504)<br>[n=69]   | 113 (95%CI: 105-123)<br>[n=652]     | 1367 (95%CI: 1038-1801)<br>[n=76]      | 231 (95%CI: 213-250)<br>[n=640]     |
| Live virus neutralising antibody,<br>normalised NT <sub>80</sub> | 1395 (95%CI: 900-2164)<br>[n=32]   | 262 (95%CI: 239-288)<br>[n=317]     | 3041 (95%CI: 2380-3885)<br>[n=30]      | 690 (95%CI: 630-756)<br>[n=342]     |
| Cellular response (WT), SFC/10 <sup>6</sup><br>PBMCs             | 148 (95%CI: 110-199)<br>[n=71]     | 36 (95%CI: 33-40) [n=645]           | 164 (95%CI: 132-203)<br>[n=77]         | 35 (95%CI: 31-38) [n=634]           |

\* Data shown are geometric mean (95% CI).

## Supplementary Figures

### Supplementary Figure 1: Solicited systemic and local reactions (Bar chart)

**Severity of solicited local and systemic reactions in days 0-7 following 3rd dose vaccination by study arm, priming vaccine schedule and age group, as self-reported in participant electronic diaries, A1) Group A local; A2) Group A systemic; B1) Group B local; B2) Group B systemic; C1) Group C local; C2) Group C systemic.**

The severity presented is the participant's highest severity across 7 days post vaccination for each solicited AEs. The details of grading can be found in the protocol section 13.4 "Assessment of severity". Control A/B/C=quadrivalent meningococcal conjugate vaccine; ChAd=ChAdOx1 nCoV-19 vaccine, Oxford–AstraZeneca; NVX=NVX-CoV2373 vaccine, Novavax; NVX half=half dose of NVX-CoV2373 vaccine; BNT=BNT162b2 vaccine (Pfizer–BioNTech); VLA=VLA2001 vaccine, Valneva; VLA half=half dose of VLA2001 vaccine; Ad26=Ad26.COVS vaccine, Janssen; BNT half=half dose of BNT162b2 vaccine; MOD=mRNA1273 vaccine, Moderna; CVn=CVnCoV vaccine, Curevac.

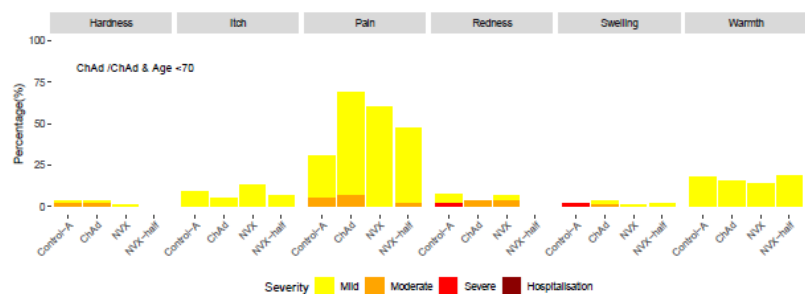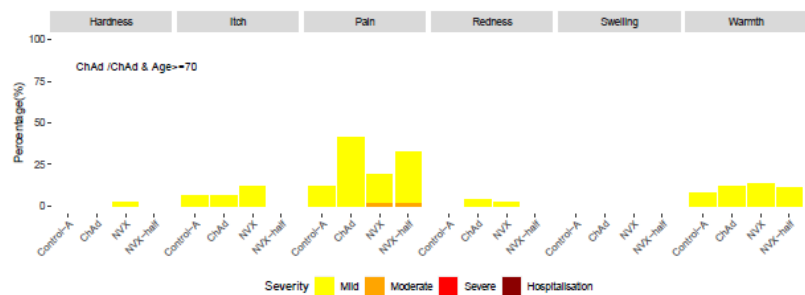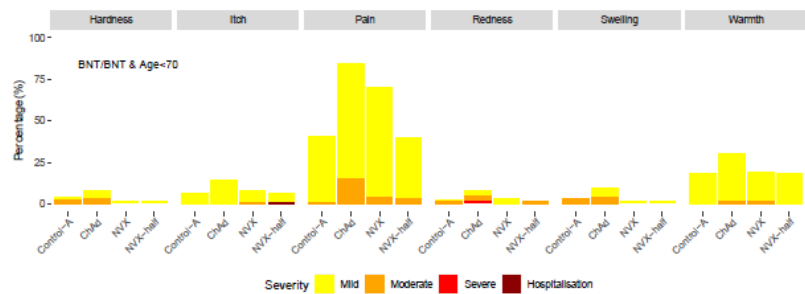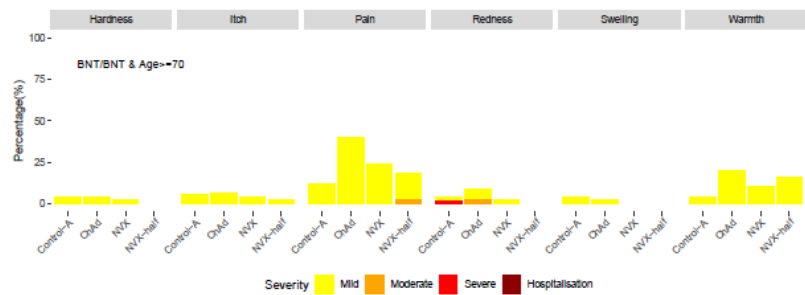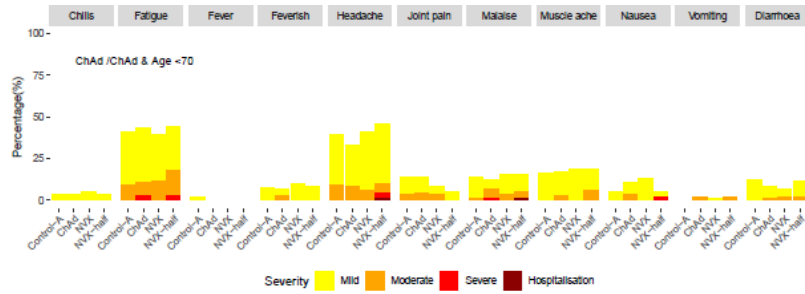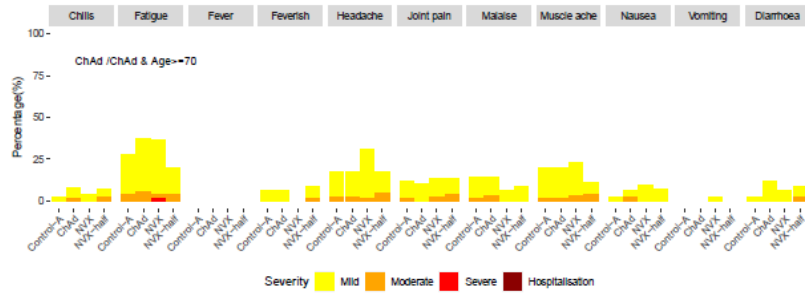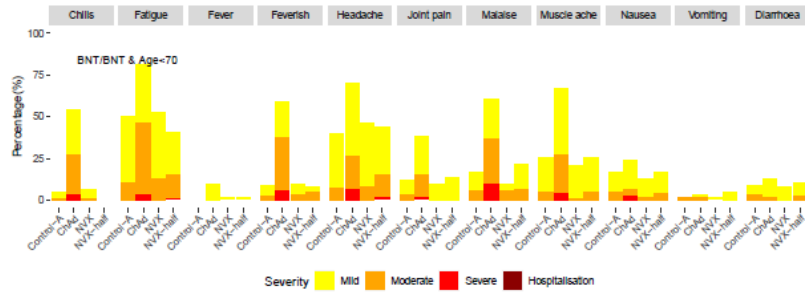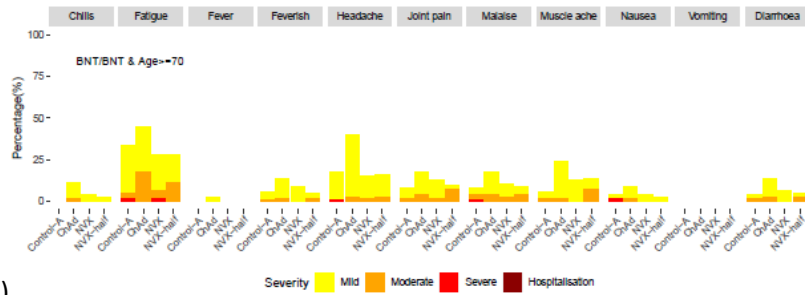

A1)

A2)



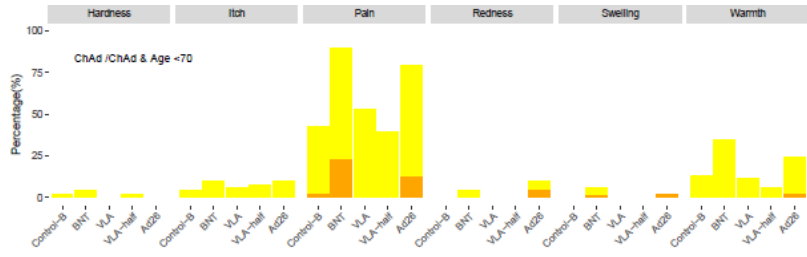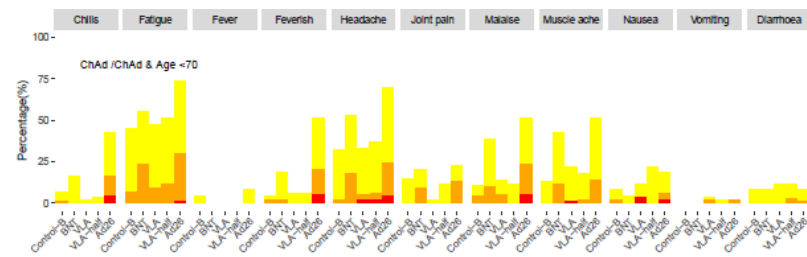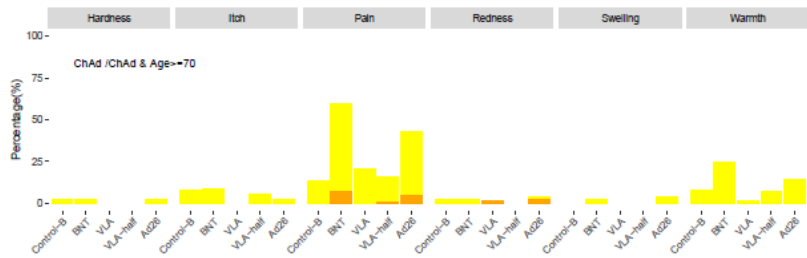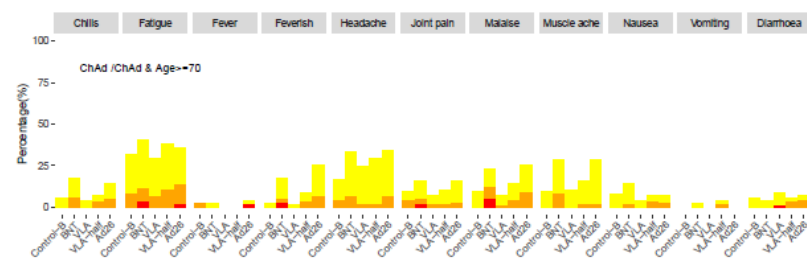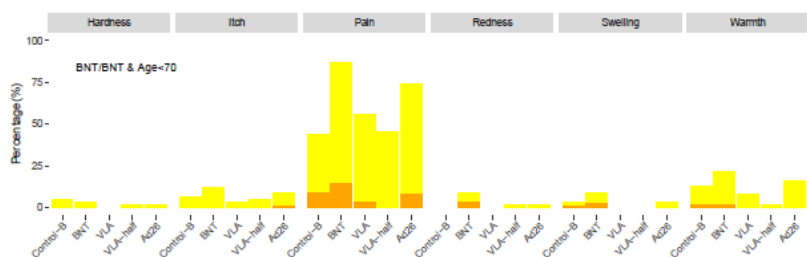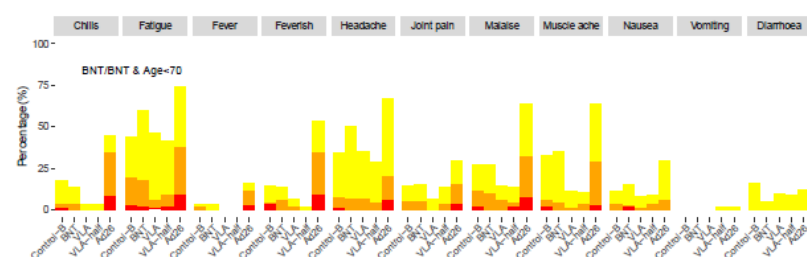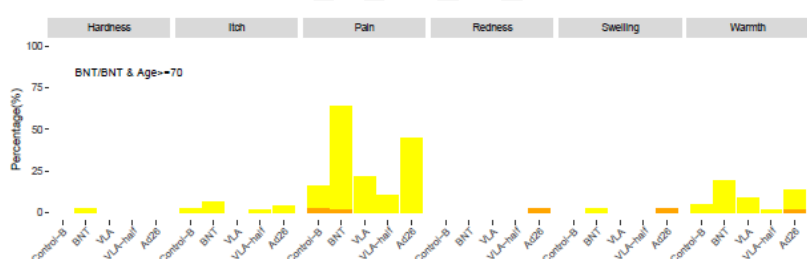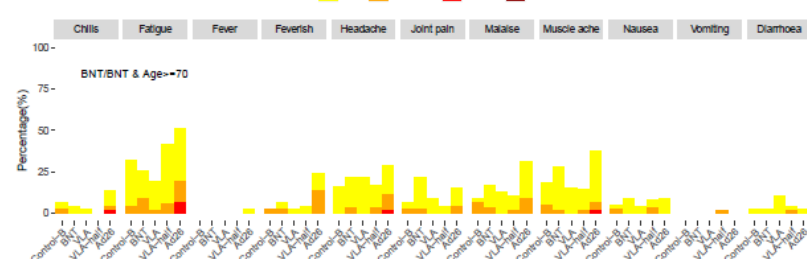

B1)

B2)

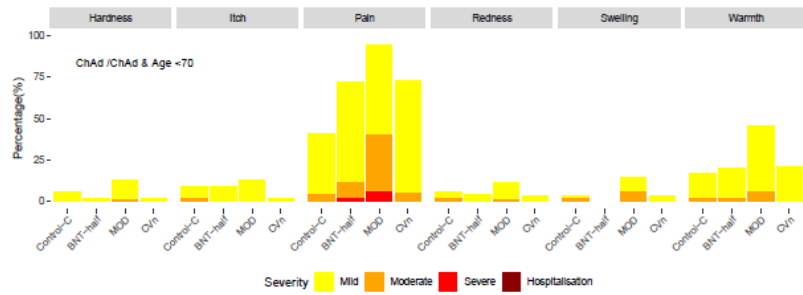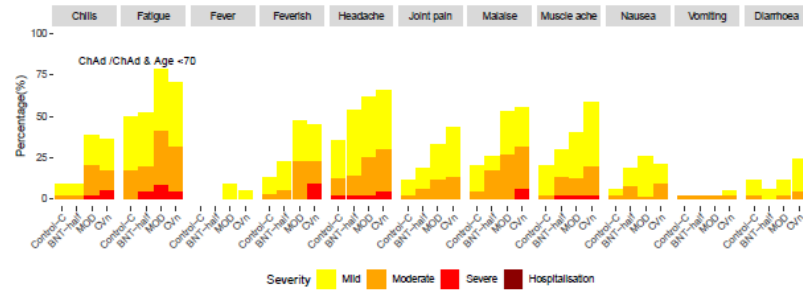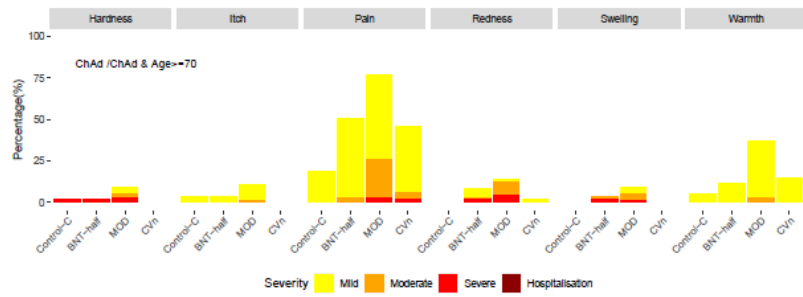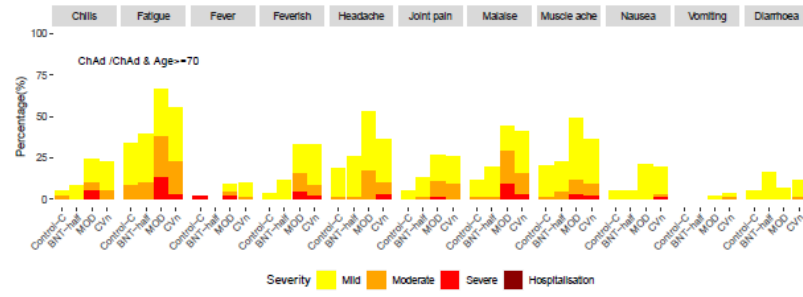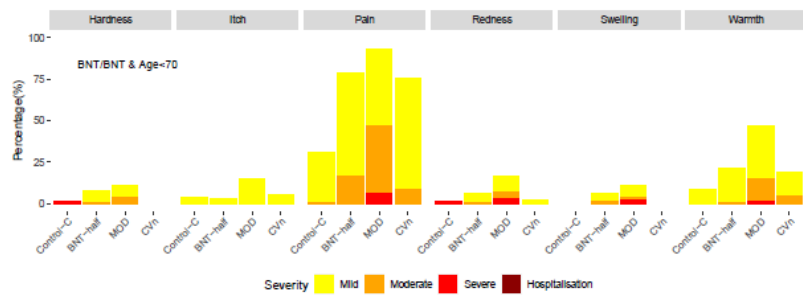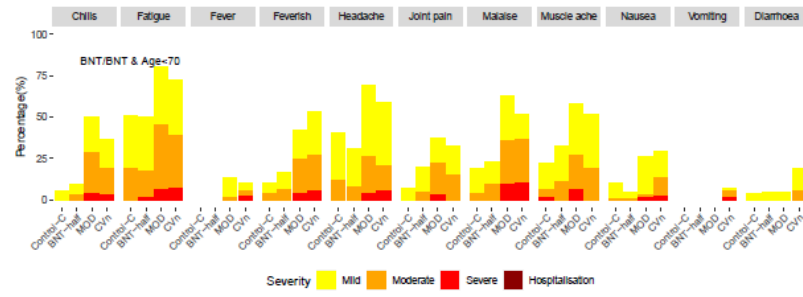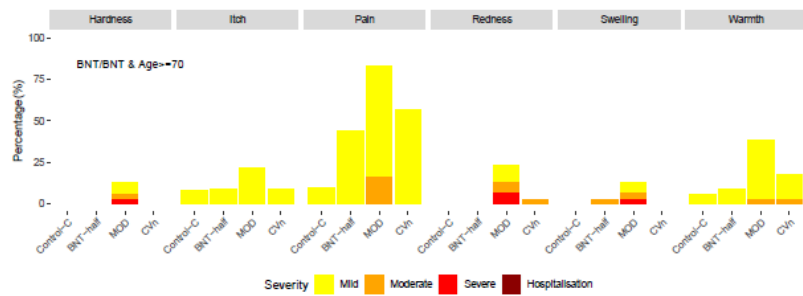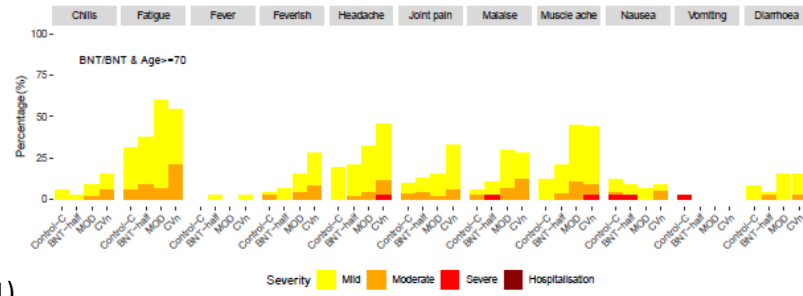

C1)

C2)

## Supplementary Figure 2: Severity of solicited reactions (Radial chart)

**Severity of solicited local and systemic reactions in days 0-7 following 3rd dose vaccination by study arm as self-reported in participant electronic diaries, A1) Group A severe; A2) Group A moderate; B1) Group B severe; B2) Group B moderate; C1) Group C severe; C2) Group C moderate**

Data presented on each spike axis is the proportion of severe (A1, B1, C1) and moderate (A2, B2, C2) local and solicited AEs among the participants with self-reported diary data. For each AE, we used the maximum severity recorded across 7 days post vaccination. Area defined by each vaccine provides a visual representation of reactogenicity burden, where greater area indicates greater burden. The details of grading can be found in the protocol section 13.4 "Assessment of severity". Control A/B/C=quadrivalent meningococcal conjugate vaccine; ChAd=ChAdOx1 nCoV-19 vaccine, Oxford–AstraZeneca; NVX=NVX-CoV2373 vaccine, Novavax; NVX half=half dose of NVX-CoV2373 vaccine; BNT=BNT162b2 vaccine (Pfizer–BioNTech); VLA=VLA2001 vaccine, Valneva; VLA half=half dose of VLA2001 vaccine; Ad26=Ad26.COVS vaccine, Janssen; BNT half=half dose of BNT162b2 vaccine; MOD=mRNA1273 vaccine, Moderna; CVn=CVnCoV vaccine, Curevac.

Supplementary Figure 2.A1 Group A severe

ChAd /ChAd & Age <70

- Control-A
- ChAd
- NVX
- NVX-half

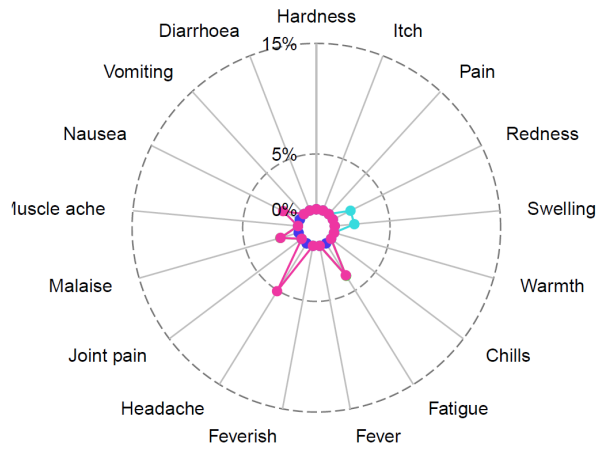

ChAd /ChAd & Age >=70

- Control-A
- ChAd
- NVX
- NVX-half

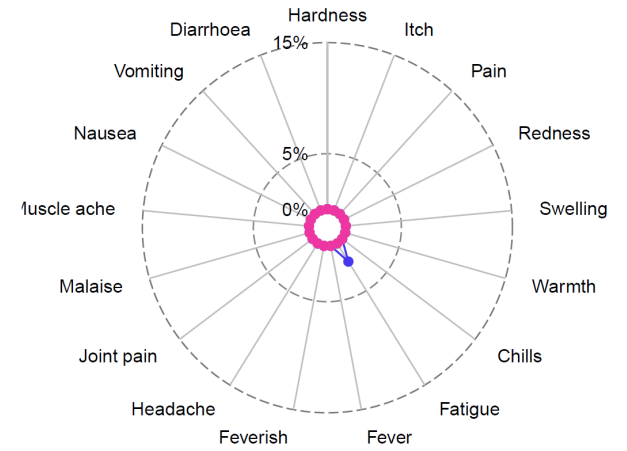

BNT/BNT & Age <70

- Control-A
- ChAd
- NVX
- NVX-half

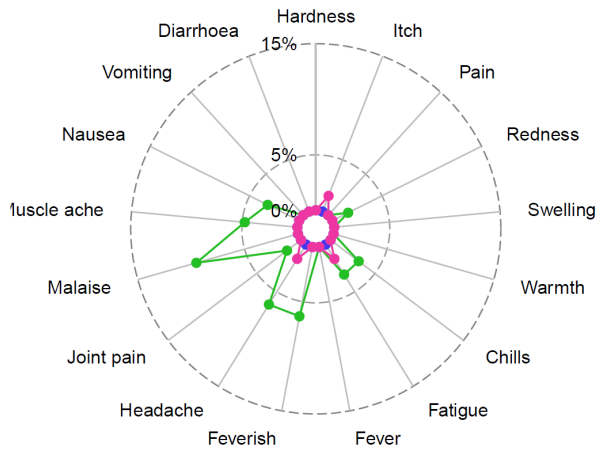

BNT/BNT & Age >=70

- Control-A
- ChAd
- NVX
- NVX-half

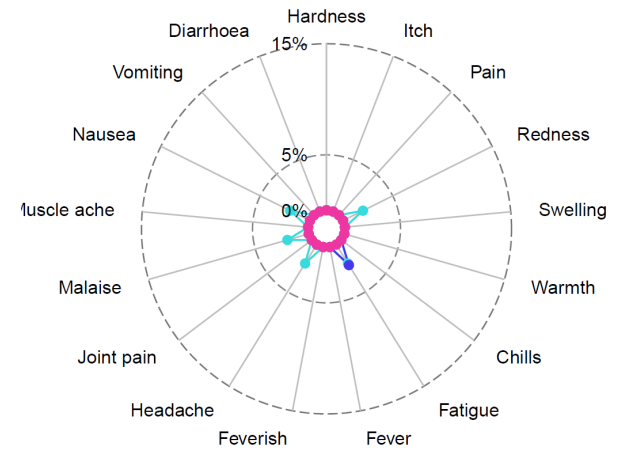

Supplementary Figure 2.A2 Group A moderate and severe

ChAd /ChAd & Age <70

- Control-A
- ChAd
- NVX
- NVX-half

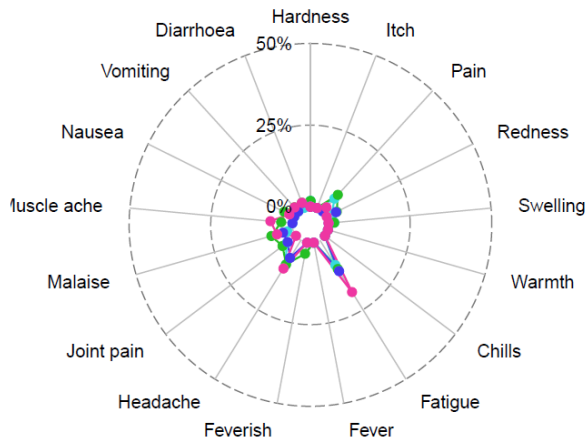

ChAd /ChAd & Age >=70

- Control-A
- ChAd
- NVX
- NVX-half

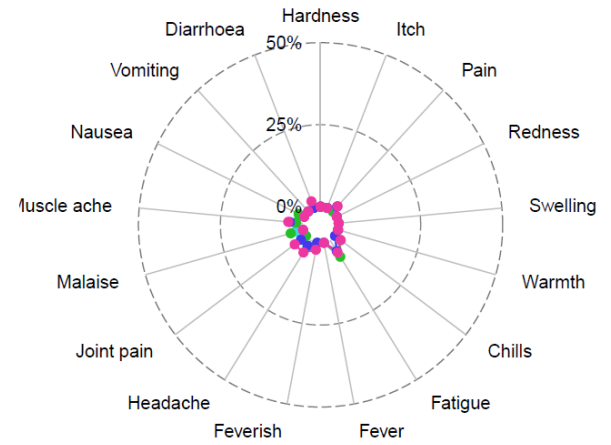

BNT/BNT & Age <70

- Control-A
- ChAd
- NVX
- NVX-half

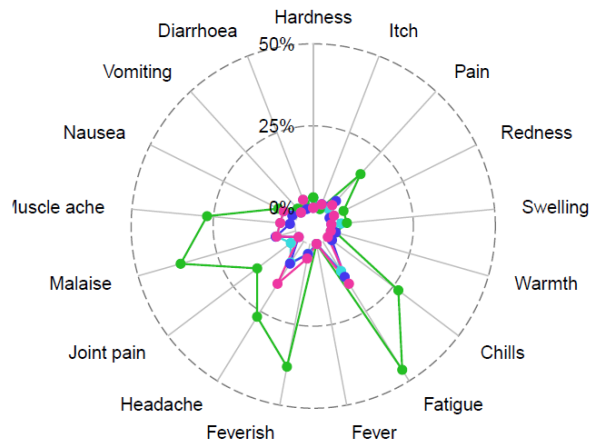

BNT/BNT & Age >=70

- Control-A
- ChAd
- NVX
- NVX-half

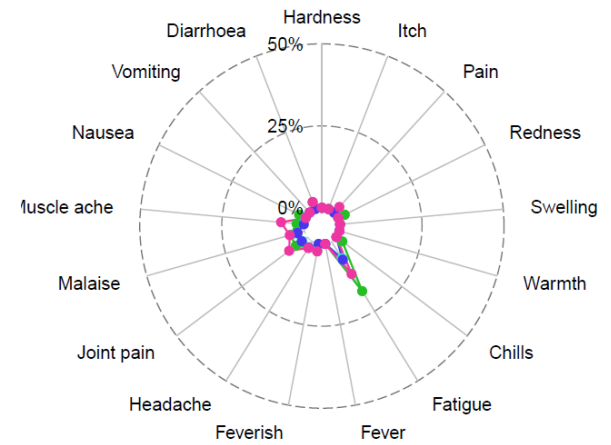

**Supplementary Figure 2.B1 Group B severe**

**ChAd /ChAd & Age<=70**

- Control-B
- BNT
- VLA
- VLA-half
- Ad26

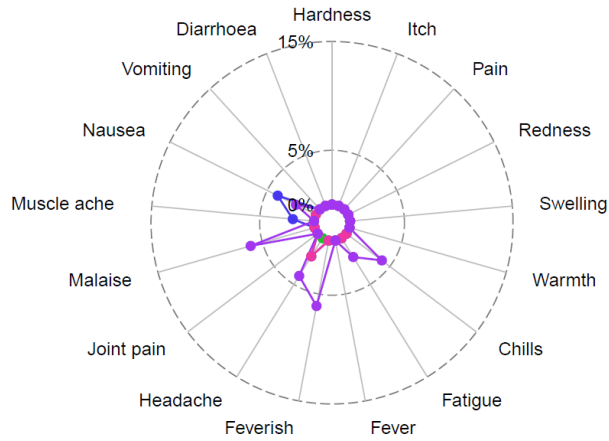

**ChAd /ChAd & Age>=70**

- Control-B
- BNT
- VLA
- VLA-half
- Ad26

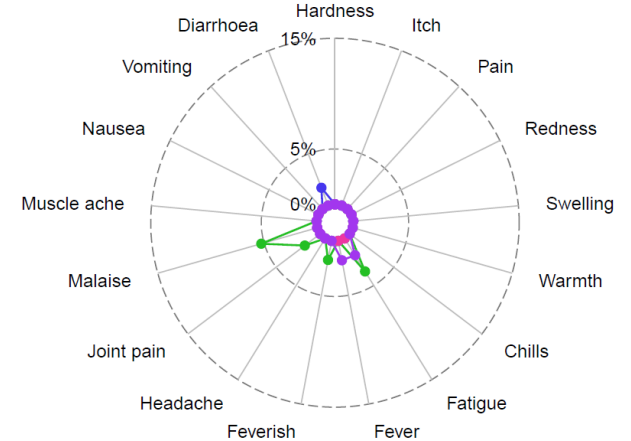

**BNT/BNT & Age<70**

- Control-B
- BNT
- VLA
- VLA-half
- Ad26

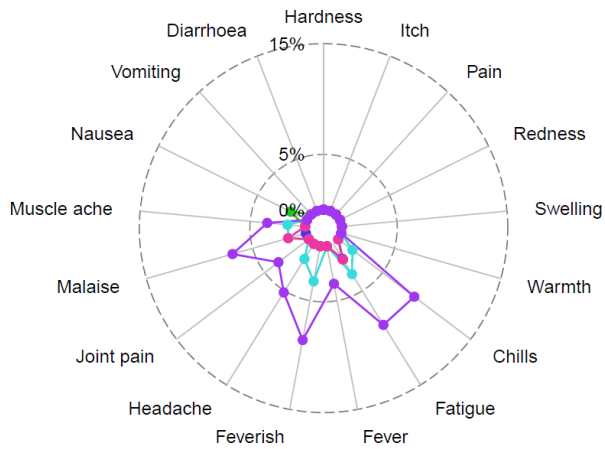

**BNT/BNT & Age>=70**

- Control-B
- BNT
- VLA
- VLA-half
- Ad26

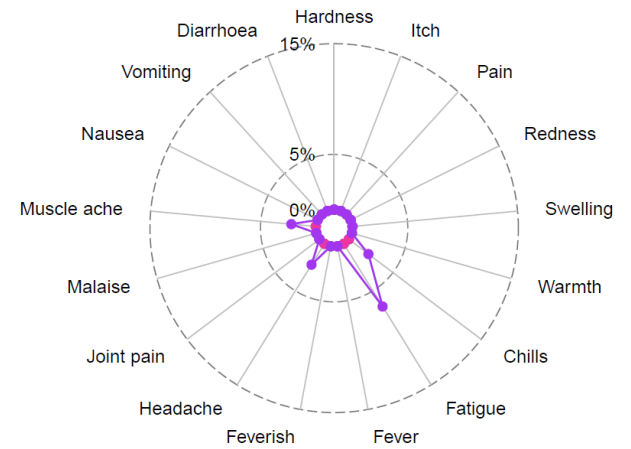

**Supplementary Figure 2.B2 Group B moderate and severe**

**ChAd /ChAd & Age<=70**

- Control-B
- BNT
- VLA
- VLA-half
- Ad26

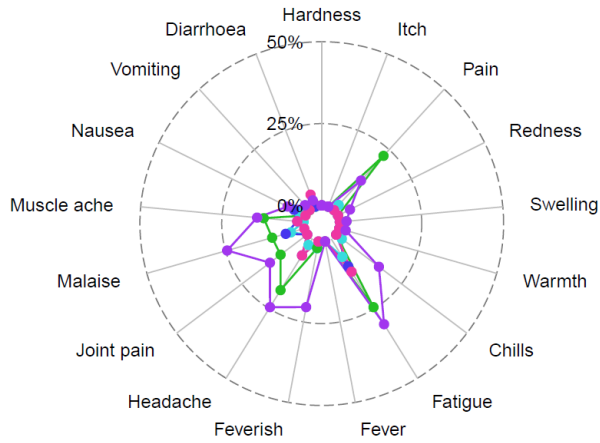

**ChAd /ChAd & Age>=70**

- Control-B
- BNT
- VLA
- VLA-half
- Ad26

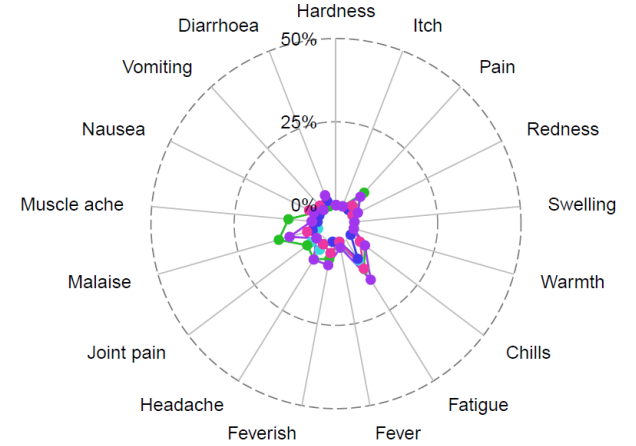

**BNT/BNT & Age<70**

- Control-B
- BNT
- VLA
- VLA-half
- Ad26

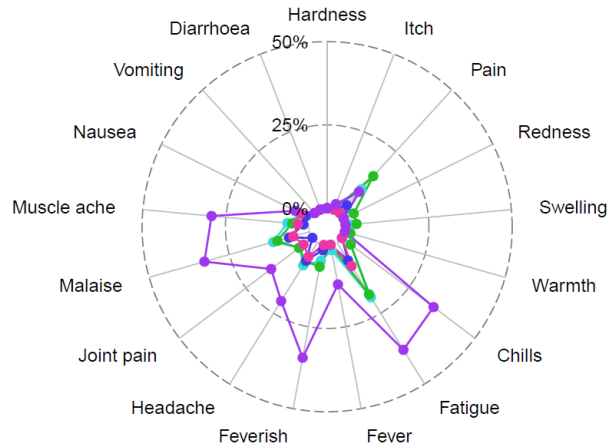

**BNT/BNT & Age>=70**

- Control-B
- BNT
- VLA
- VLA-half
- Ad26

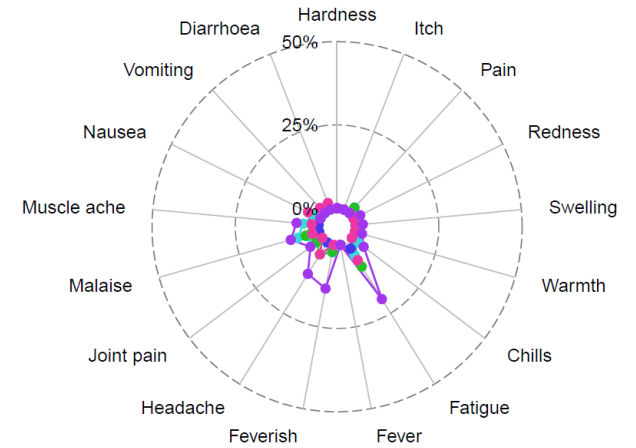

Supplementary Figure 2.C1 Group C severe

ChAd /ChAd & Age <70

- Control-C
- BNT-half
- MOD
- CVn

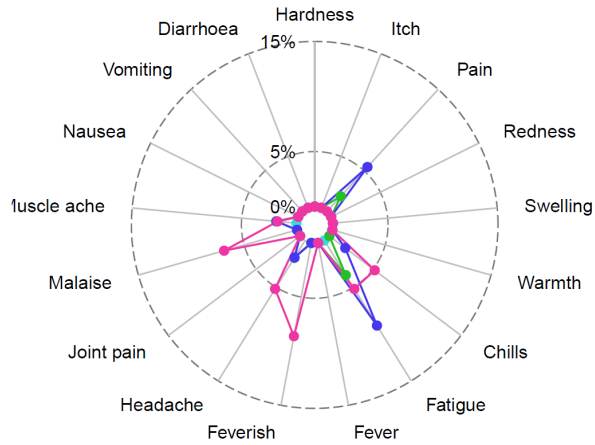

ChAd /ChAd & Age >=70

- Control-C
- BNT-half
- MOD
- CVn

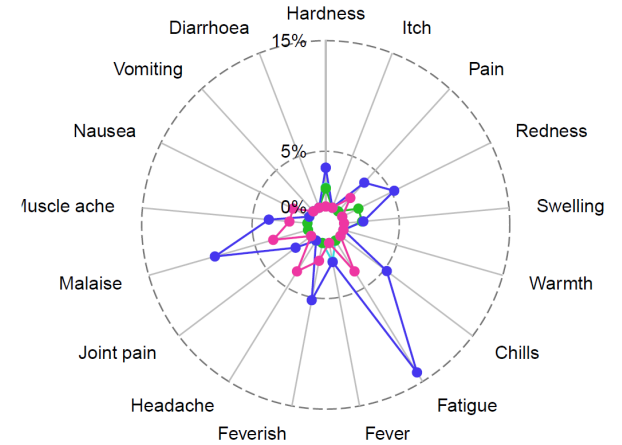

BNT/BNT & Age <70

- Control-C
- BNT-half
- MOD
- CVn

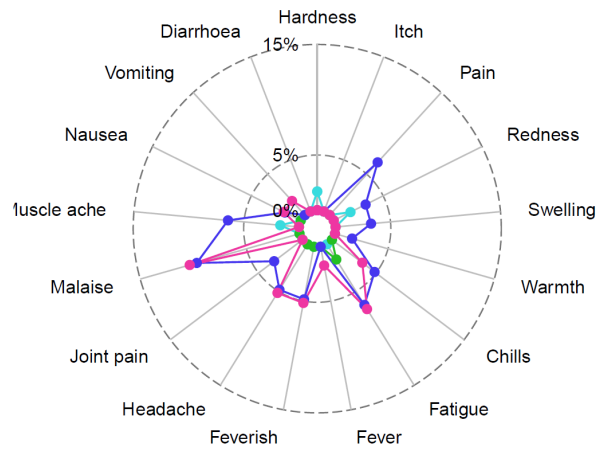

BNT/BNT & Age >=70

- Control-C
- BNT-half
- MOD
- CVn

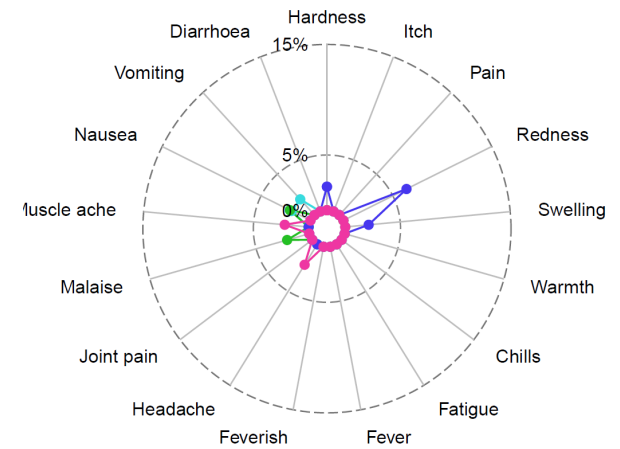



Supplementary Figure 2.C2 Group C moderate and severe

ChAd /ChAd & Age <70

- Control-C
- BNT-half
- MOD
- CVn

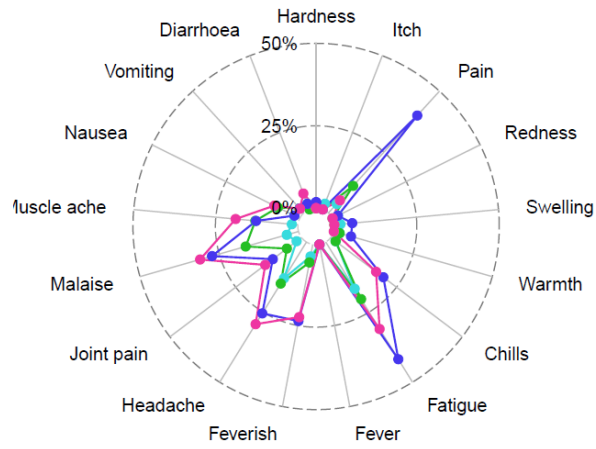

ChAd /ChAd & Age >=70

- Control-C
- BNT-half
- MOD
- CVn

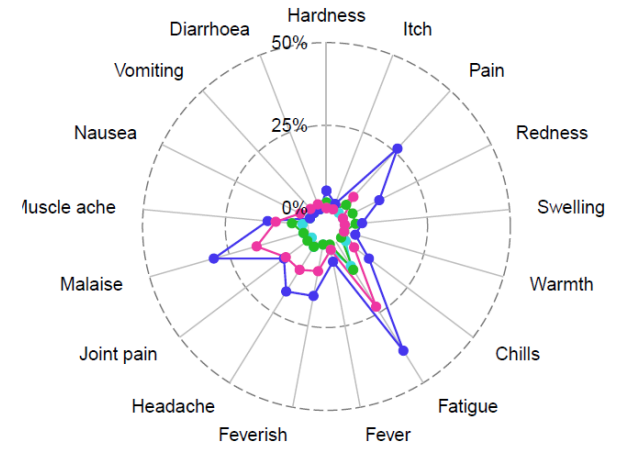

BNT/BNT & Age <70

- Control-C
- BNT-half
- MOD
- CVn

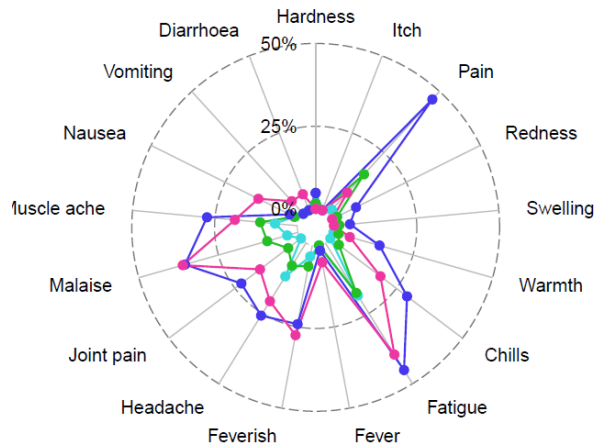

BNT/BNT & Age >=70

- Control-C
- BNT-half
- MOD
- CVn

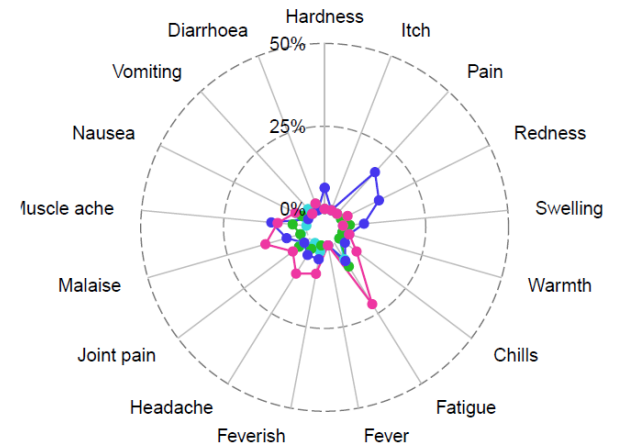

### Supplementary Figure 3: Kinetics of immunogenicity

#### **A) Anti-spike IgG; B) T cell response, by prime vaccine schedules among the immunology cohort**

Control A/B/C=quadrivalent meningococcal conjugate vaccine; ChAd=ChAdOx1 nCoV-19 vaccine, Oxford–AstraZeneca; NVX=NVX-CoV2373 vaccine, Novavax; NVX half=half dose of NVX-CoV2373 vaccine; BNT=BNT162b2 vaccine (Pfizer–BioNTech); VLA=VLA2001 vaccine, Valneva; VLA half=half dose of VLA2001 vaccine; Ad26=Ad26.COVS vaccine, Janssen; BNT half=half dose of BNT162b2 vaccine; MOD=mRNA1273 vaccine, Moderna; CVn=CVnCoV vaccine, Curevac.

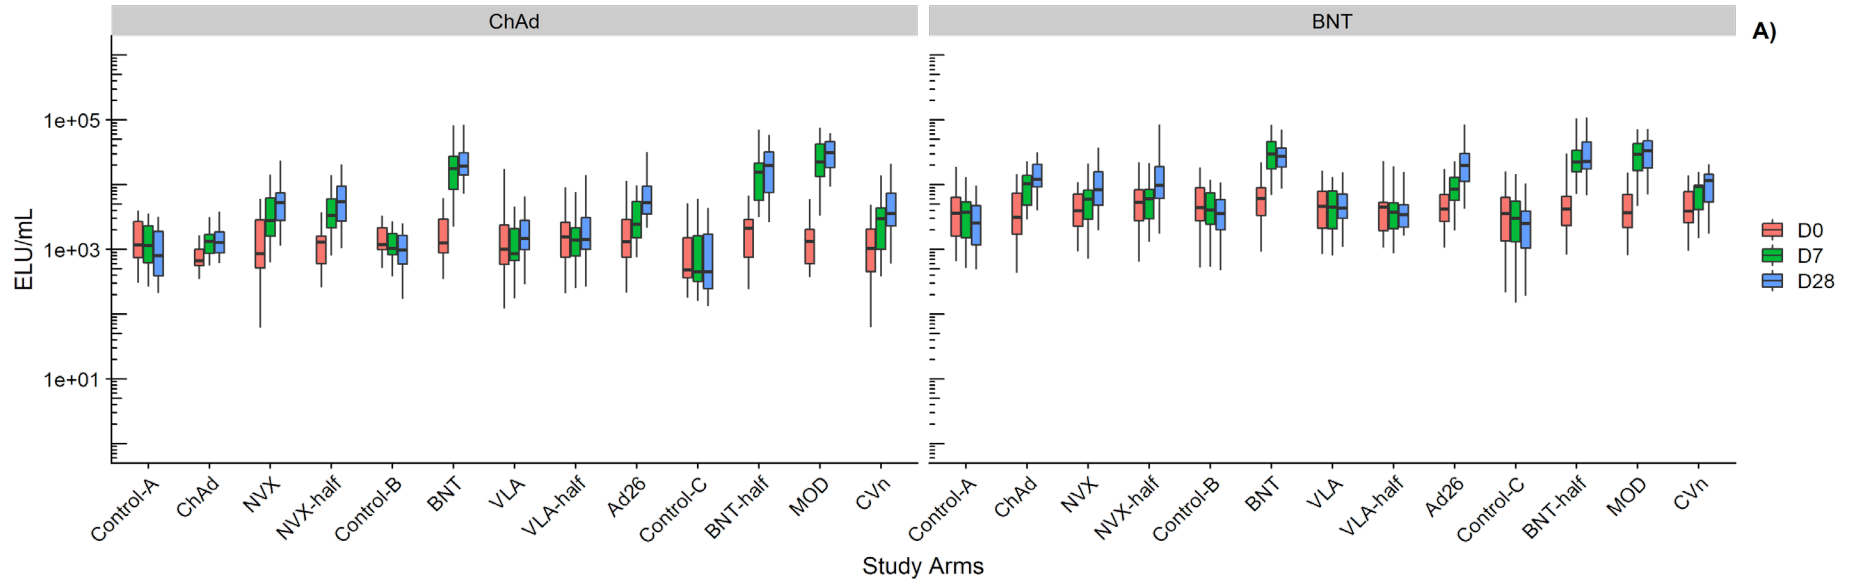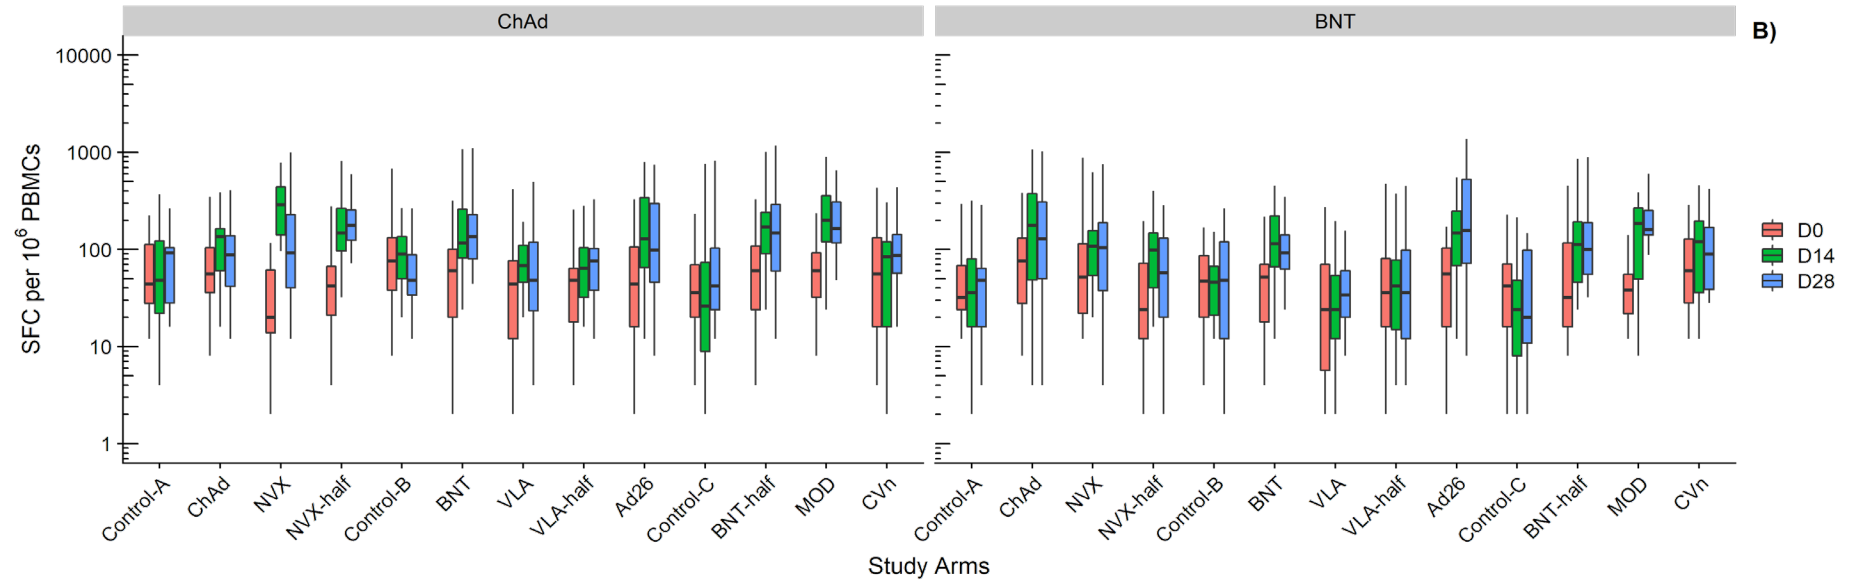

#### Supplementary Figure 4: Correlation between PNA for WT and Delta

**Correlation between PNA against WT and PNA against Delta strain at 28 days post 3rd dose in participants with A) ChAd/ChAd prime in Group A; B) BNT/BNT prime in Group A; C) ChAd/ChAd prime in Group B; D) BNT/BNT prime in Group B; E) ChAd/ChAd prime in Group C; F) BNT/BNT prime in Group C.**

The dotted diagonal line shows the situation when the immunogenicity to a variant of concern (VOC) is the same as that to the WT (the vaccines were designed for). Ellipses show the 95% CIs for different vaccine schedules, assuming multivariate normal distributions. NT50=50% neutralising antibody titre. Control A/B/C=quadrivalent meningococcal conjugate vaccine; ChAd=ChAdOx1 nCoV-19 vaccine, Oxford–AstraZeneca; NVX=NVX-CoV2373 vaccine, Novavax; NVX half=half dose of NVX-CoV2373 vaccine; BNT=BNT162b2 vaccine (Pfizer–BioNTech); VLA=VLA2001 vaccine, Valneva; VLA half=half dose of VLA2001 vaccine; Ad26=Ad26.COVS vaccine, Janssen; BNT half=half dose of BNT162b2 vaccine; MOD=mRNA1273 vaccine, Moderna; CVn=CVnCoV vaccine, Curevac.

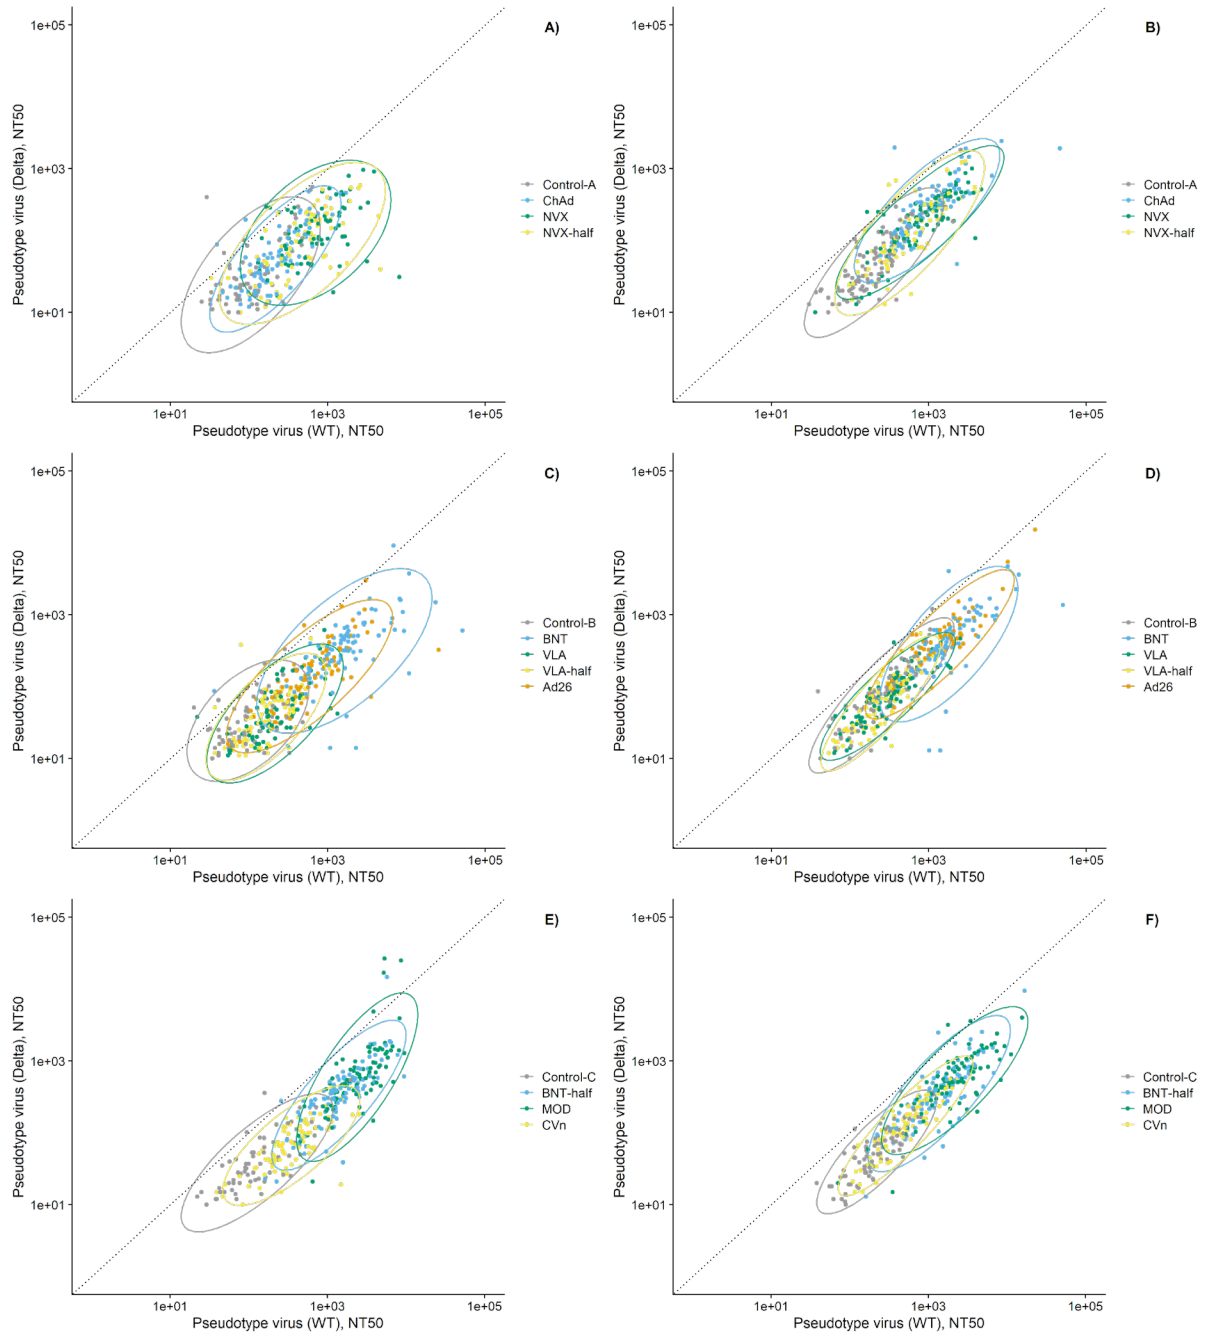

## Supplementary Figure 5: Correlation between cellular response for WT and Beta

**Correlation between cellular response against WT and cellular response against Beta strain at 28 days post 3rd dose in participants with A) ChAd/ChAd prime in Group A; B) BNT/BNT prime in Group A; C) ChAd/ChAd prime in Group B; D) BNT/BNT prime in Group B; E) ChAd/ChAd prime in Group C; F) BNT/BNT prime in Group C.**

The dotted diagonal line shows the situation when the immunogenicity to a variant of concern (VOC) is the same as that to the WT (the vaccines were designed for). Ellipses show the 95% CIs for different vaccine schedules, assuming multivariate normal distributions. PBMC=peripheral blood mononuclear cell. SFC=spot-forming units. Control A/B/C=quadrivalent meningococcal conjugate vaccine; ChAd=ChAdOx1 nCoV-19 vaccine, Oxford–AstraZeneca; NVX=NVX-CoV2373 vaccine, Novavax; NVX half=half dose of NVX-CoV2373 vaccine; BNT=BNT162b2 vaccine (Pfizer–BioNTech); VLA=VLA2001 vaccine, Valneva; VLA half=half dose of VLA2001 vaccine; Ad26=Ad26.COVS vaccine, Janssen; BNT half=half dose of BNT162b2 vaccine; MOD=mRNA1273 vaccine, Moderna; CVn=CVnCoV vaccine, Curevac.

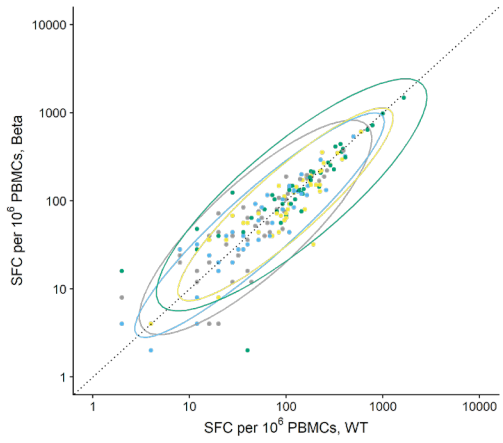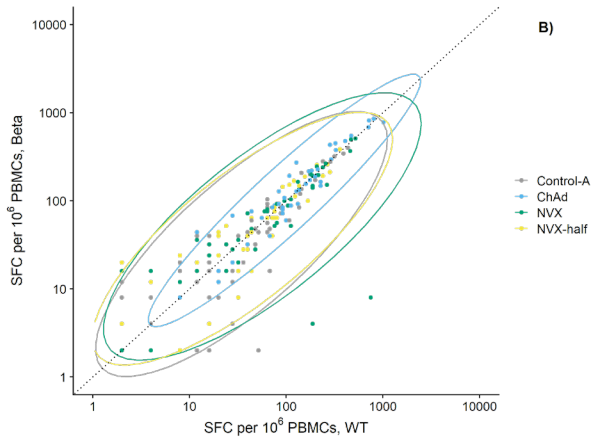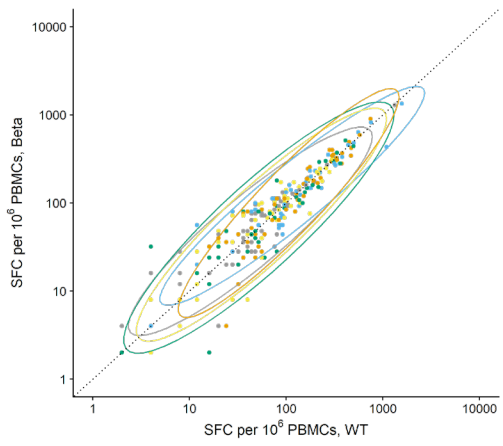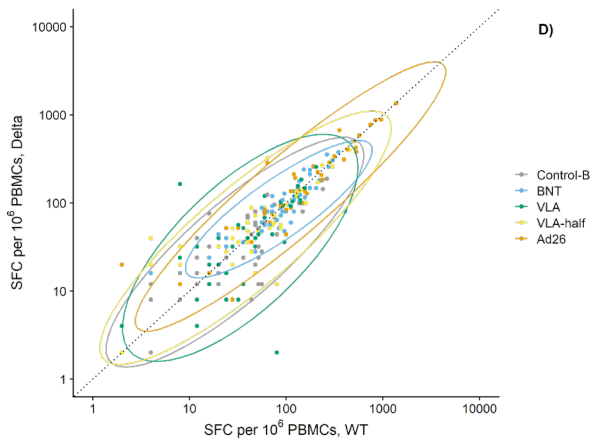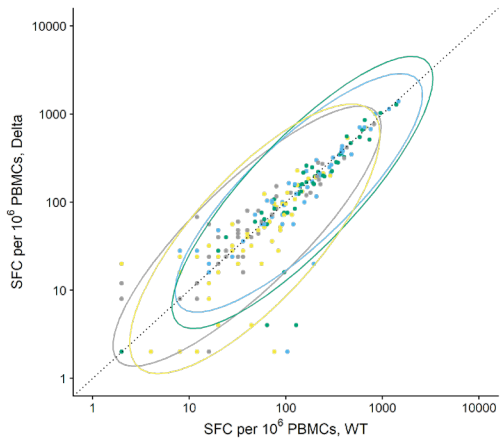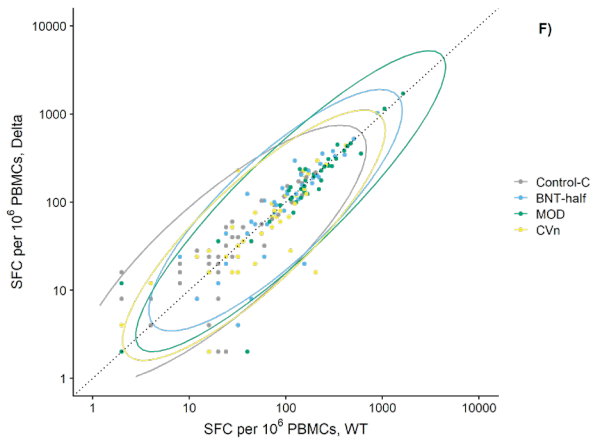

## Supplementary Figure 6: Correlation between cellular response for WT and Delta

**Correlation between cellular response against WT and cellular response against Delta strain at 28 days post 3rd dose in participants with A) ChAd/ChAd prime in Group A; B) BNT/BNT prime in Group A; C) ChAd/ChAd prime in Group B; D) BNT/BNT prime in Group B; E) ChAd/ChAd prime in Group C; F) BNT/BNT prime in Group C.**

The dotted diagonal line shows the situation when the immunogenicity to a variant of concern (VOC) is the same as that to the WT (the vaccines were designed for). Ellipses show the 95% CIs for different vaccine schedules, assuming multivariate normal distributions. PBMC=peripheral blood mononuclear cell. SFC=spot-forming units. Control A/B/C=quadrivalent meningococcal conjugate vaccine; ChAd=ChAdOx1 nCoV-19 vaccine, Oxford–AstraZeneca; NVX=NVX-CoV2373 vaccine, Novavax; NVX half=half dose of NVX-CoV2373 vaccine; BNT=BNT162b2 vaccine (Pfizer–BioNTech); VLA=VLA2001 vaccine, Valneva; VLA half=half dose of VLA2001 vaccine; Ad26=Ad26.COVS vaccine, Janssen; BNT half=half dose of BNT162b2 vaccine; MOD=mRNA1273 vaccine, Moderna; CVn=CVnCoV vaccine, Curevac.



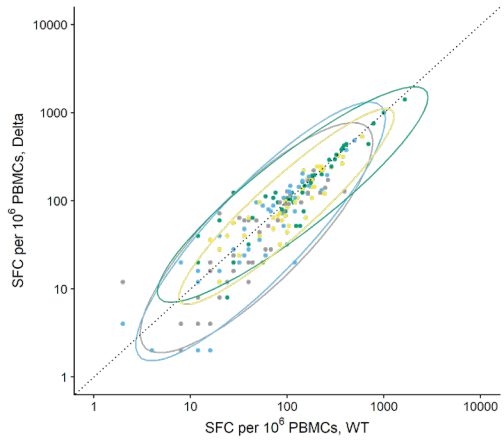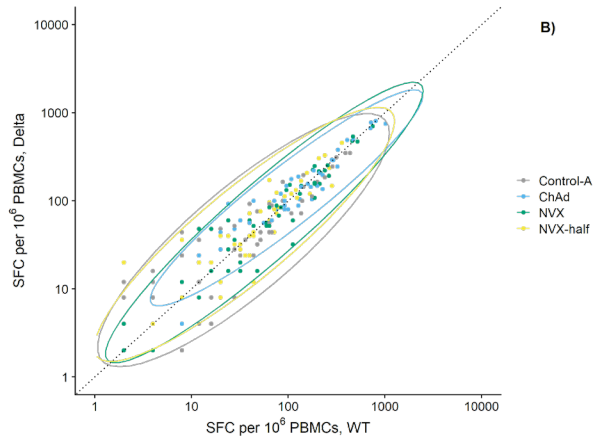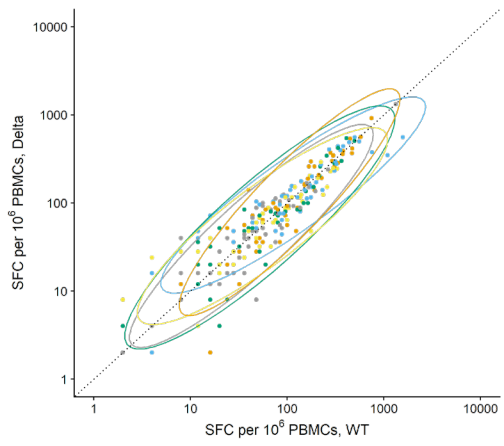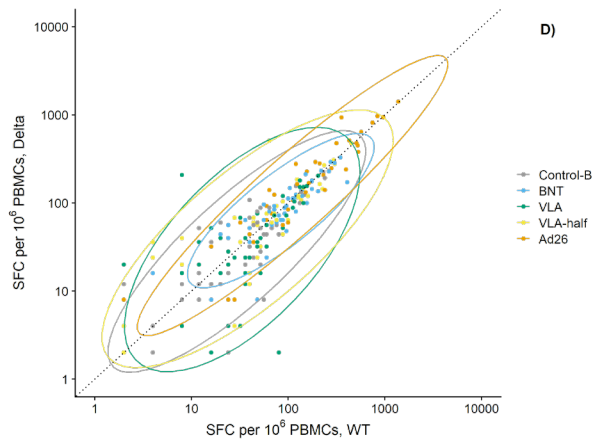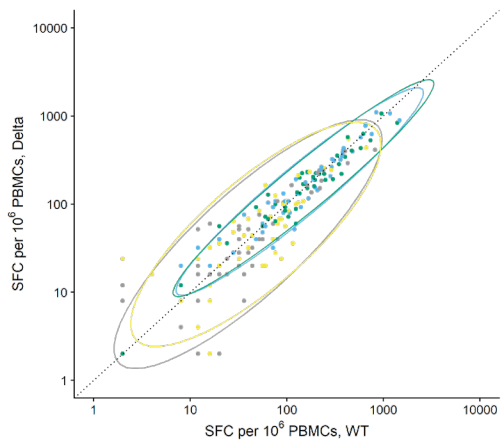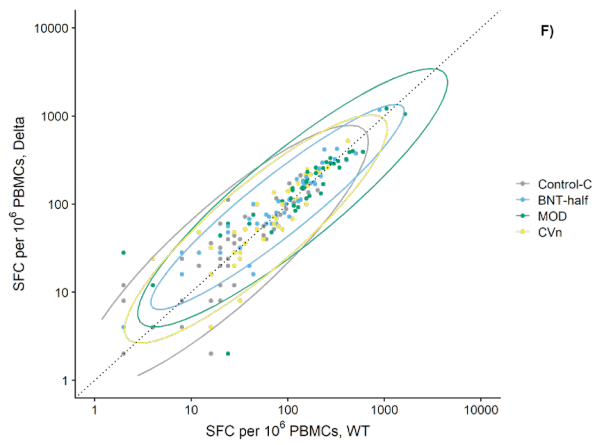

**Supplementary Figure 7: Immunogenicity by Serostatus (anti-nucleocapsid IgG).**

**A) Anti-spike IgG and B) T cell response pre-3<sup>rd</sup> dose; C) Anti-spike IgG and D) T cell response at 28 days post 3<sup>rd</sup> dose vaccination by prime vaccine schedules between pre-vaccination serostatus (measured by anti-nucleocapsid IgG).**

Control A/B/C=quadrivalent meningococcal conjugate vaccine; ChAd=ChAdOx1 nCoV-19 vaccine, Oxford–AstraZeneca; NVX=NVX-CoV2373 vaccine, Novavax; NVX half=half dose of NVX-CoV2373 vaccine; BNT=BNT162b2 vaccine (Pfizer–BioNTech); VLA=VLA2001 vaccine, Valneva; VLA half=half dose of VLA2001 vaccine; Ad26=Ad26.COVS vaccine, Janssen; BNT half=half dose of BNT162b2 vaccine; MOD=mRNA1273 vaccine, Moderna; CVn=CVnCoV vaccine, Curevac.

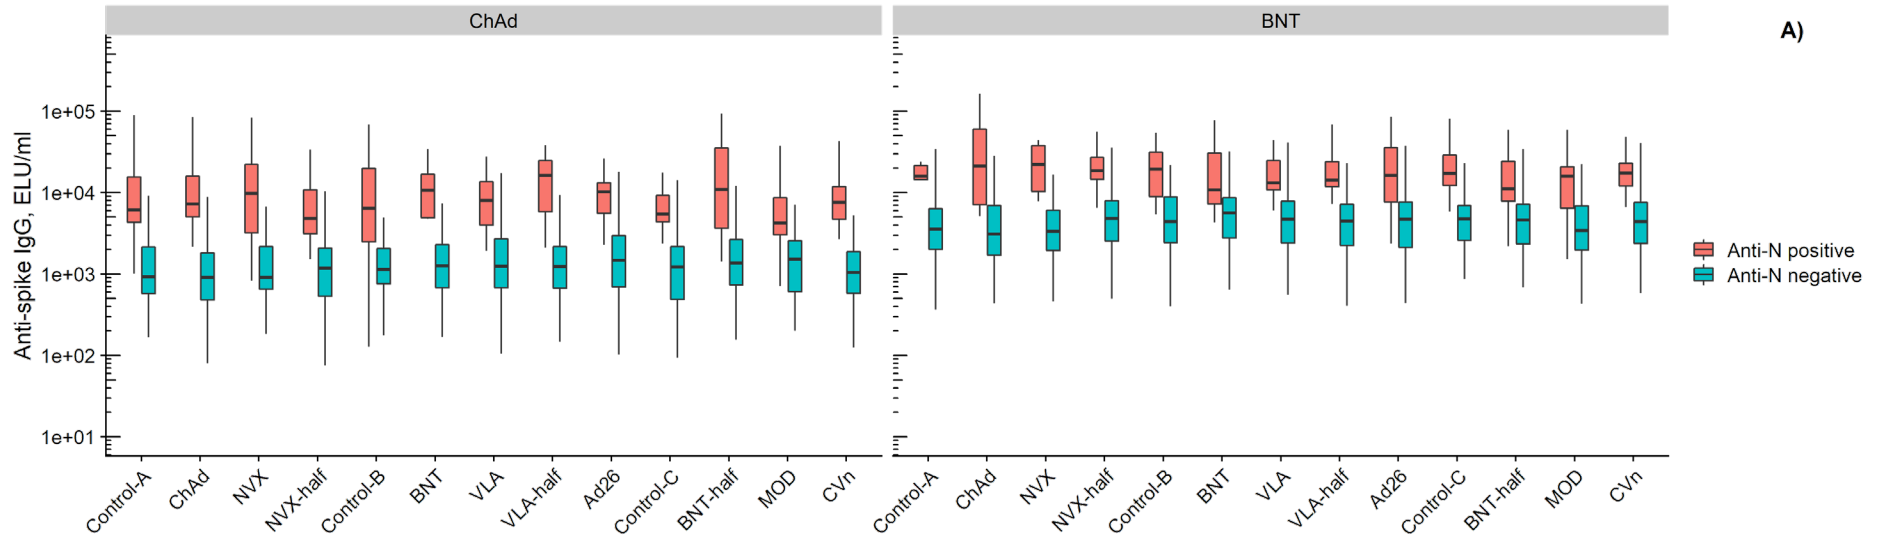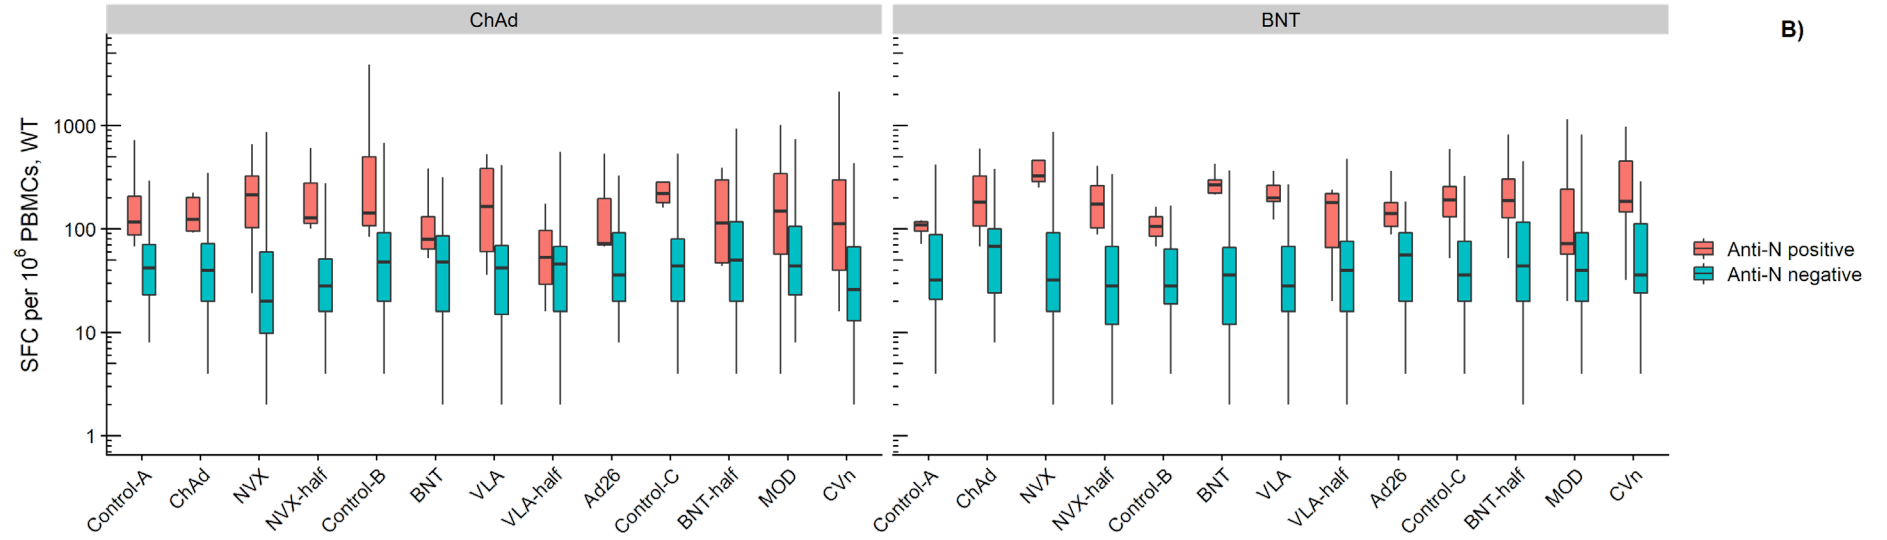

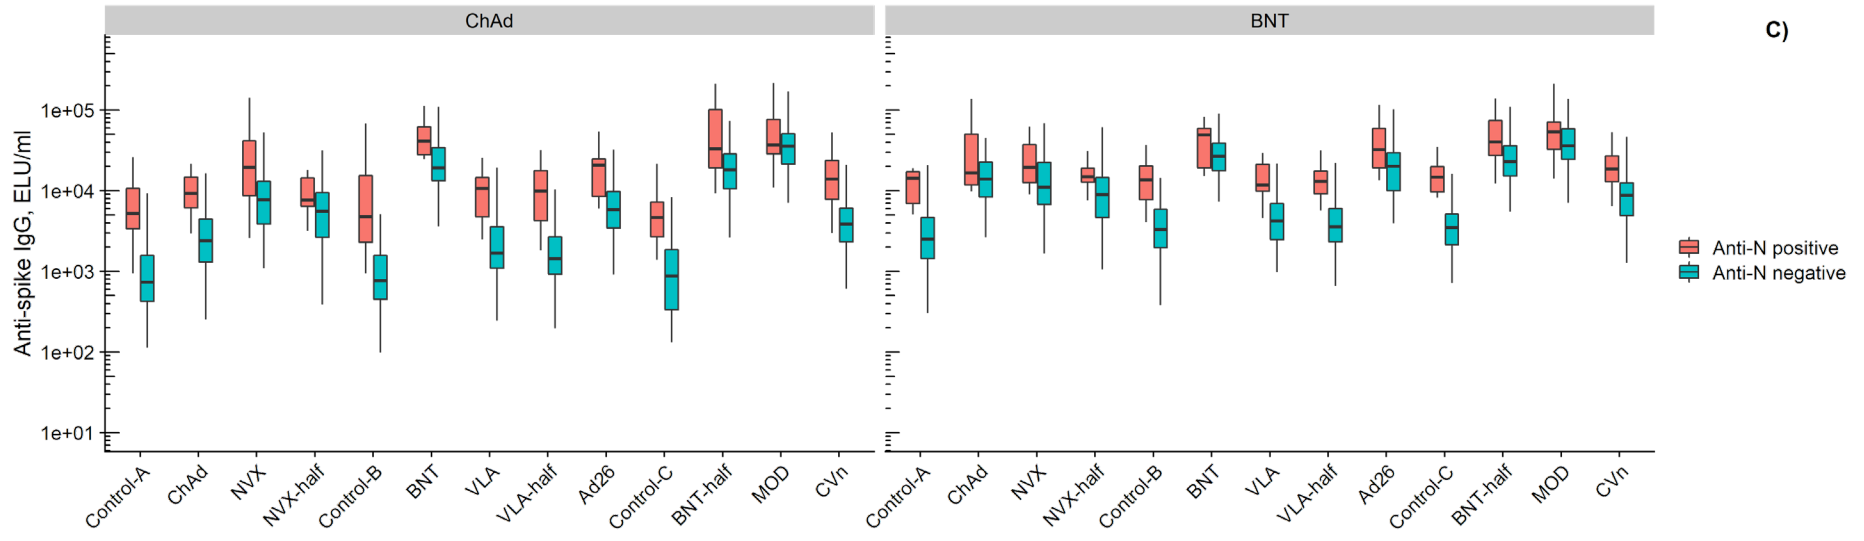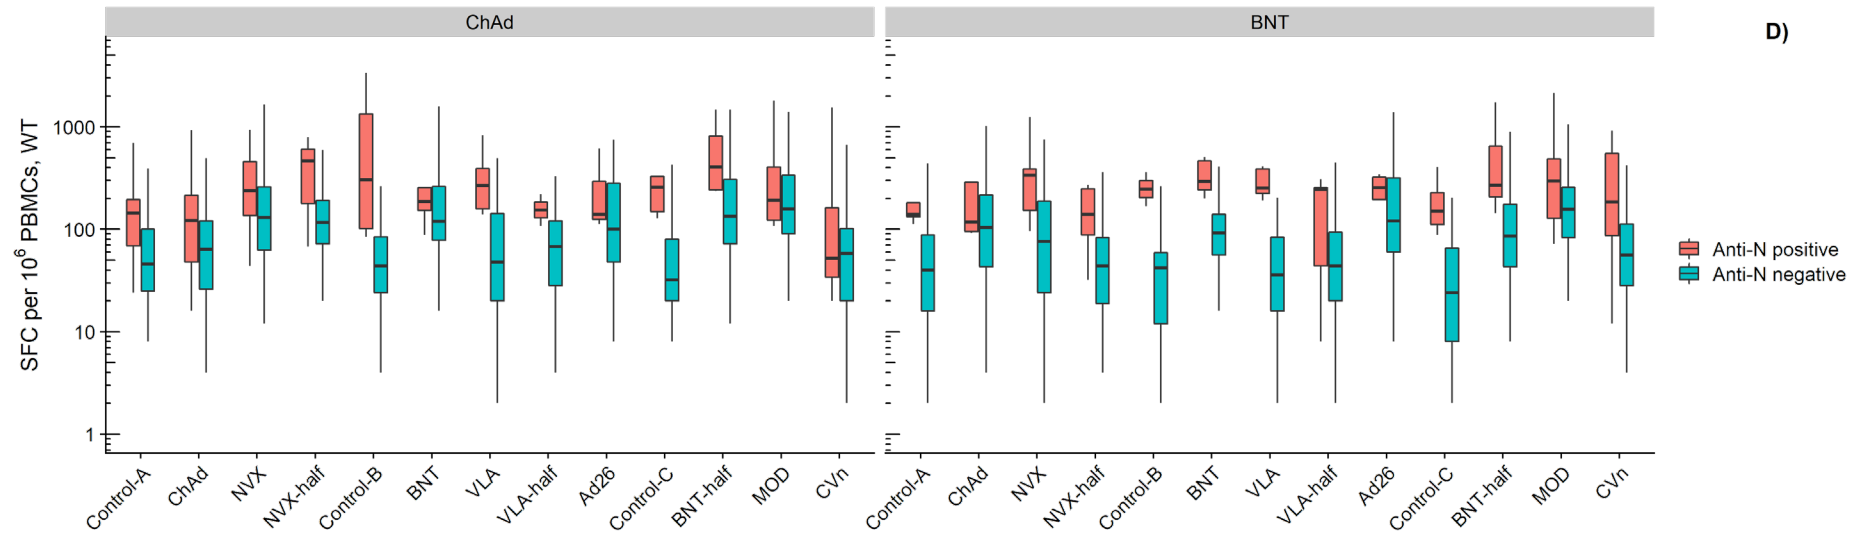

## Supplementary Figure 8: Correlation between anti-spike IgG and PNA

**Correlation between anti-spike IgG and PNA against WT at 28 days post 3rd dose in participants with A) ChAd/ChAd prime in Group A; B) BNT/BNT prime in Group A; C) ChAd/ChAd prime in Group B; D) BNT/BNT prime in Group B; E) ChAd/ChAd prime in Group C; F) BNT/BNT prime in Group C.**

Ellipses show the 95% CIs for different vaccine schedules, assuming multivariate normal distributions. ELU=ELISA laboratory units. NT50=50% neutralising antibody titre. Control A/B/C=quadrivalent meningococcal conjugate vaccine; ChAd=ChAdOx1 nCoV-19 vaccine, Oxford–AstraZeneca; NVX=NVX-CoV2373 vaccine, Novavax; NVX half=half dose of NVX-CoV2373 vaccine; BNT=BNT162b2 vaccine (Pfizer–BioNTech); VLA=VLA2001 vaccine, Valneva; VLA half=half dose of VLA2001 vaccine; Ad26=Ad26.COVS vaccine, Janssen; BNT half=half dose of BNT162b2 vaccine; MOD=mRNA1273 vaccine, Moderna; CVn=CVnCoV vaccine, Curevac.

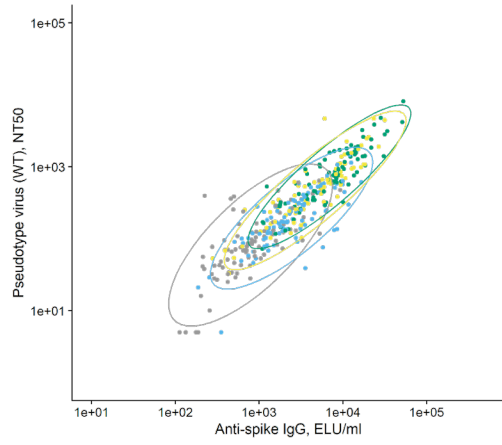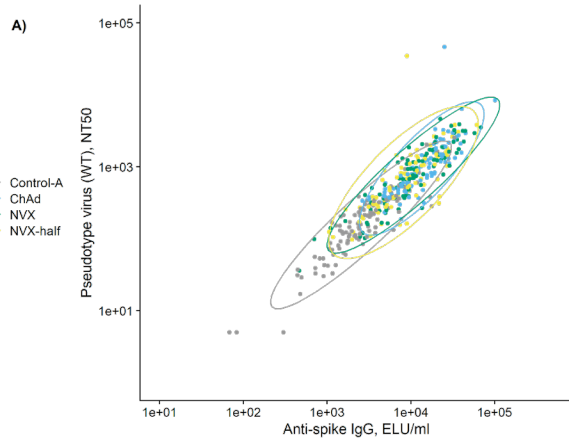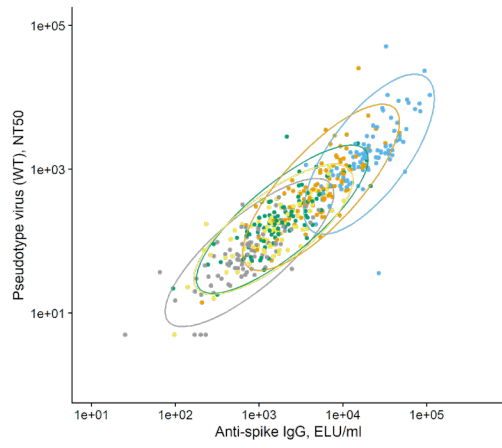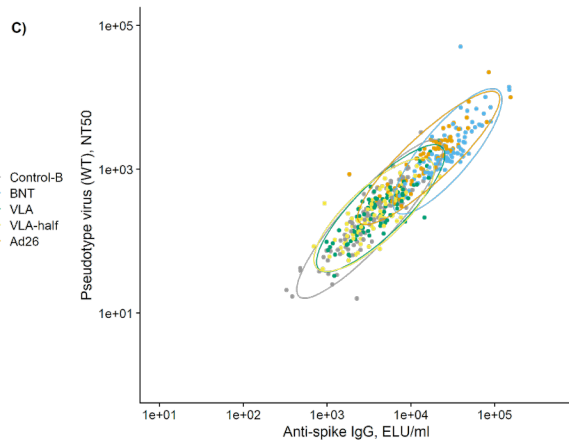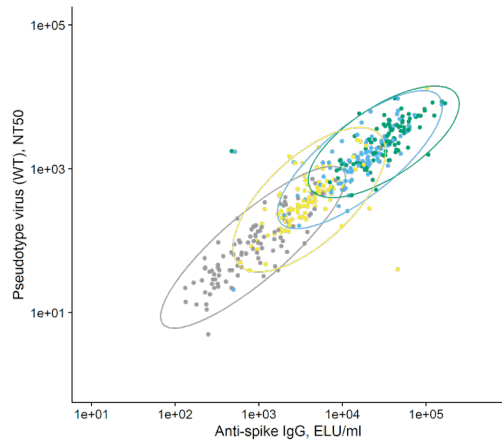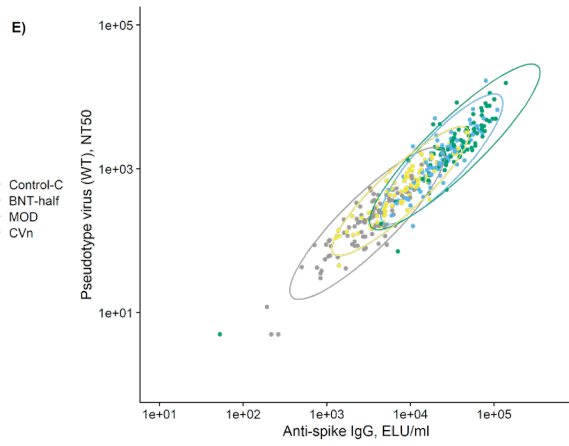

## Supplementary Figure 9: Correlation between anti-spike IgG and cellular response

**Correlation between anti-spike IgG and cellular response against WT at 28 days post 3rd dose in participants with A) ChAd/ChAd prime in Group A; B) BNT/BNT prime in Group A; C) ChAd/ChAd prime in Group B; D) BNT/BNT prime in Group B; E) ChAd/ChAd prime in Group C; F) BNT/BNT prime in Group C.**

Ellipses show the 95% CIs for different vaccine schedules, assuming multivariate normal distributions. ELU=ELISA laboratory units. PBMC=peripheral blood mononuclear cell. SFC=spot-forming units. Control A/B/C=quadrivalent meningococcal conjugate vaccine; ChAd=ChAdOx1 nCoV-19 vaccine, Oxford–AstraZeneca; NVX=NVX-CoV2373 vaccine, Novavax; NVX half=half dose of NVX-CoV2373 vaccine; BNT=BNT162b2 vaccine (Pfizer–BioNTech); VLA=VLA2001 vaccine, Valneva; VLA half=half dose of VLA2001 vaccine; Ad26=Ad26.COVS vaccine, Janssen; BNT half=half dose of BNT162b2 vaccine; MOD=mRNA1273 vaccine, Moderna; CVn=CVnCoV vaccine, Curevac.

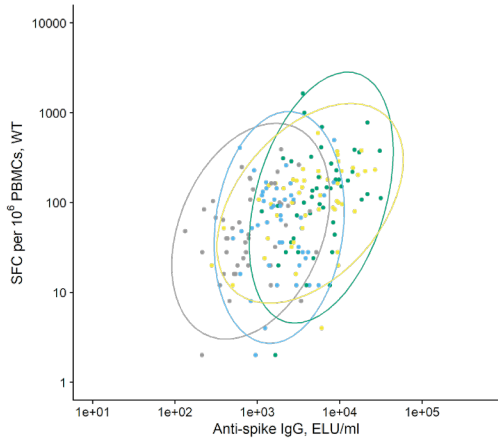

A)

Control-A  
ChAd  
NVX  
NVX-half

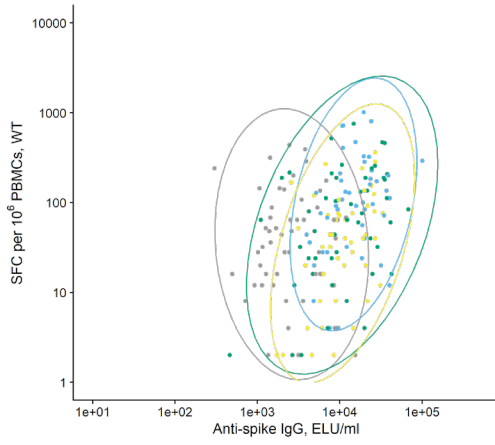

B)

Control-A  
ChAd  
NVX  
NVX-half

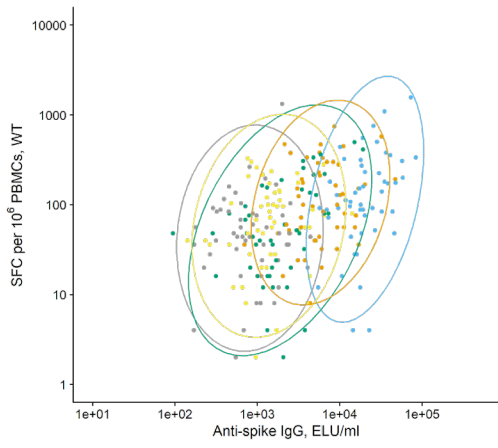

C)

Control-B  
BNT  
VLA  
VLA-half  
Ad26

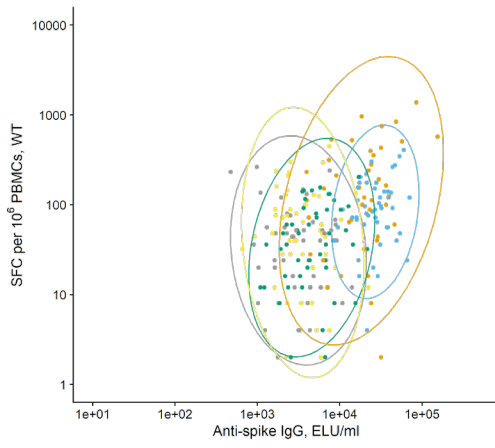

D)

Control-B  
BNT  
VLA  
VLA-half  
Ad26

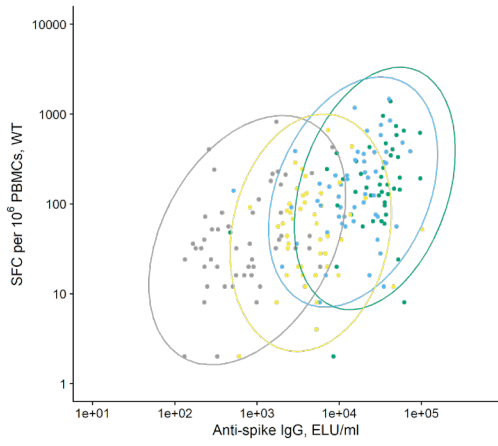

E)

Control-C  
BNT-half  
MOD  
CVn

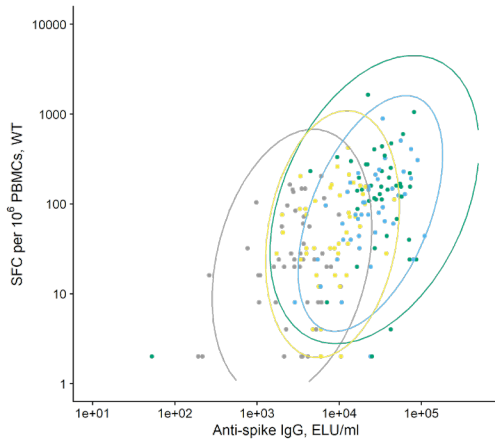

F)

Control-C  
BNT-half  
MOD  
CVn



## Supplementary Laboratory Information

### Laboratory Methods

Serum was analysed at Nexelis (Laval, Canada) for SARS-CoV-2 anti-spike IgG concentrations by ELISA (reported as ELISA laboratory units [ELU]/mL), and for SARS-CoV-2 pseudotype virus neutralisation (PNA) assay, using a vesicular stomatitis virus backbone adapted to exhibit the SARS-CoV-2 spike protein, reported as 50% neutralising antibody titres (NT<sub>50</sub>). PNA was performed on 50% of participants (same subset as cellular immunology samples) at day 0 and all participants at day 28. Serum from day 0 was analysed at Porton Down, Public Health England (PHE) by electrochemiluminescence immunoassay (Cobas platform, Roche Diagnostics) for SARS-CoV-2 anti-nucleocapsid IgG (reported as negative if below a cutoff index of 1.0). Live SARS-CoV-2 virus neutralisation (VNA, lineage Victoria/01/2020) was determined by microneutralisation assay (MNA) at Porton Down, reported as normalised NT<sub>80</sub>. Samples for VNA were pragmatically selected based on sample availability and laboratory capacity.

T-cell assays were performed at Oxford Immunotec (Abingdon, UK). IFN- $\gamma$  secreting T cells specific to whole spike protein epitopes designed based on the Wuhan-Hu-1 sequence (YP\_009724390.1), IFN- $\gamma$  secreting T cells specific to whole spike protein epitopes (Panel 20) designed based on the SARS-CoV-2 Beta (B.1.351) variant of concern (GISAID whole genome accession number EPI\_ISL\_1052554), and IFN- $\gamma$  secreting T cells specific to all genome-wide lineage defining mutations (Panel 17) and to whole spike protein epitopes (Panel 21) designed based on the SARS-CoV-2 Delta (B.1.617.2) variant of concern (GISAID whole genome accession number EPI\_ISL\_2022526), were detected by modified T-SPOT-Discovery test within 32h of venepuncture, using the addition of T-Cell Xtend reagent to extend peripheral blood mononuclear cell (PBMC) survival. T-cell frequencies were reported as spot forming cells (SFC) per 250,000 PBMCs with a lower limit of detection of one in 250,000 PBMCs, and these results were multiplied by four to express frequencies per million PBMCs.

### Laboratory Units Conversion

#### Human SARS-CoV-2 Pre-Spike IgG ELISA Conversion

The results generated for the Human SARS-CoV-2 Pre-Spike IgG ELISA are reported with concentration units in “ELU/mL”. When required a correlation factor of 1/7.9815 will be applied to convert the reported results from ELU/mL to BAU/mL. For example, a sample with reported anti-PreSpike IgG antibody concentration of 7981.5 ELU/mL will have a concentration equivalent to 1000 BAU/mL.

The following formula may be used for converting concentration units from ELU/mL to BAU/mL:  
Result (BAU/mL) = Result (ELU/mL) / 7.9815

#### Human SARS-CoV-2 Pseudoparticle Neutralisation Assay (PNA)

The results generated for the Human SARS-COV-2 PNA are reported with titer units “NT50”. When required, a correlation factor of 1/1.872 will be applied to convert the reported results from NT50 titer to IU/mL. For example, a sample with reported NT50 titer of 1872 will have a concentration equivalent to 1000IU/mL.

The following formula may be used for converting NT50 titer to IU/mL:

Result (IU/mL) = Result (NT50 titer) / 1.872

## COV-BOOST Study Group

| Name                | Affiliation                                                         |
|---------------------|---------------------------------------------------------------------|
| Andrew Riordan      | Data Monitoring Safety Committee, Alder Hey Children's Hospital     |
| Andrew Ustianowski  | Data Monitoring Safety Committee, North Manchester General Hospital |
| Chris A Rogers      | Data Safety Monitoring Committee, University of Bristol             |
| Stephen Hughes      | Betsi Cadwaladr University Health Board                             |
| Laura Longshaw      | Betsi Cadwaladr University Health Board                             |
| Jane Stockport      | Betsi Cadwaladr University Health Board                             |
| Rachel Hughes       | Betsi Cadwaladr University Health Board                             |
| Lynne Grundy        | Betsi Cadwaladr University Health Board                             |
| Lona Tudor Jones    | Betsi Cadwaladr University Health Board                             |
| Arpan Guha          | Betsi Cadwaladr University Health Board                             |
| Emma Snashall       | Betsi Cadwaladr University Health Board                             |
| Tom Eadsforth       | Betsi Cadwaladr University Health Board                             |
| Sally Reeder        | Betsi Cadwaladr University Health Board                             |
| Kim Storton         | Bradford Teaching Hospitals NHS Foundation Trust                    |
| Malathi Munusamy    | Bradford Teaching Hospitals NHS Foundation Trust                    |
| Bridget Tandy       | Bradford Teaching Hospitals NHS Foundation Trust                    |
| Akamino Egbo        | Bradford Teaching Hospitals NHS Foundation Trust                    |
| Stephen Cox         | Bradford Teaching Hospitals NHS Foundation Trust                    |
| Nabeela Nazir Ahmed | Bradford Teaching Hospitals NHS Foundation Trust                    |
| Anil Shenoy         | Bradford Teaching Hospitals NHS Foundation Trust                    |

|                     |                                                                                        |
|---------------------|----------------------------------------------------------------------------------------|
| Rachel Bousfield    | Department of Infectious Diseases, Cambridge University Hospitals NHS Foundation Trust |
| Donna Wixted        | Dorset County Hospital                                                                 |
| Helen Gutteridge    | Dorset Research Hub                                                                    |
| Becky Mansfield     | Dorset Research Hub                                                                    |
| Christopher Herbert | Leeds Teaching Hospitals NHS Trust                                                     |
| Kyra Holliday       | Leeds Teaching Hospitals NHS Trust                                                     |
| James Calderwood    | Leeds Teaching Hospitals NHS Trust                                                     |
| Dominique Barker    | Leeds Teaching Hospitals NHS Trust                                                     |
| Jacqueline Brandon  | Leeds Teaching Hospitals NHS Trust                                                     |
| Hayley Tulloch      | Leeds Teaching Hospitals NHS Trust                                                     |
| Suzie Colquhoun     | Leeds Teaching Hospitals NHS Trust                                                     |
| Helen Thorp         | Leeds Teaching Hospitals NHS Trust                                                     |
| Helen Radford       | Leeds Teaching Hospitals NHS Trust                                                     |
| Julie Evans         | Leeds Teaching Hospitals NHS Trust                                                     |
| Helena Baker        | Leeds Teaching Hospitals NHS Trust                                                     |
| Jeanette Thorpe     | Leeds Teaching Hospitals NHS Trust                                                     |
| Sally Batham        | Leicester CRF                                                                          |
| Jessica Hailstone   | Leicester CRF                                                                          |
| Rachael Phillips    | Leicester CRF                                                                          |
| Dileep Kumar        | Leicester CRF                                                                          |
| Fran Westwell       | Liverpool University Hospitals NHS Foundation Trust                                    |
| Fiona Makia         | London Northwest University Healthcare                                                 |

|                         |                                                                                |
|-------------------------|--------------------------------------------------------------------------------|
| NinaSimone Hopkins      | London Northwest University Healthcare                                         |
| Lara Barcella           | London Northwest University Healthcare                                         |
| Mushiya Mpelembue       | London Northwest University Healthcare                                         |
| Maja dabagh             | London Northwest University Healthcare                                         |
| Matilda lang            | London Northwest University Healthcare                                         |
| Farida khan             | London Northwest University Healthcare                                         |
| Olumide Adebambo        | London Northwest University Healthcare                                         |
| Sunder Chita            | London Northwest University Healthcare                                         |
| Tumena Corrah           | London Northwest University Healthcare                                         |
| Ashley Whittington      | London Northwest University Healthcare                                         |
| Laurence John           | London Northwest University Healthcare                                         |
| Siobhan Roche           | National Institute of Health Research, West Midlands Clinical Research Network |
| Lynda Wagstaff          | National Institute of Health Research, West Midlands Clinical Research Network |
| Adam Farrier            | Newcastle University                                                           |
| Karen Bisnauthsing      | NIHR BRC at Guy's and St Thomas' NHS Foundation Trust                          |
| Teona Serafimova        | NIHR BRC at Guy's and St Thomas' NHS Foundation Trust                          |
| Elisa Nanino            | NIHR BRC at Guy's and St Thomas' NHS Foundation Trust                          |
| Enya Cooney             | NIHR BRC at Guy's and St Thomas' NHS Foundation Trust                          |
| Jaimie Wilson-Goldsmith | NIHR BRC at Guy's and St Thomas' NHS Foundation Trust                          |
| Hanna Nguyen            | NIHR BRC at Guy's and St Thomas' NHS Foundation Trust                          |
| Andrea Mazzella         | NIHR BRC at Guy's and St Thomas' NHS Foundation Trust                          |
| Beth Jackson            | NIHR BRC at Guy's and St Thomas' NHS Foundation Trust                          |

|                       |                                                                                      |
|-----------------------|--------------------------------------------------------------------------------------|
| Suahil Aslam          | NIHR BRC at Guy's and St Thomas' NHS Foundation Trust                                |
| Tanveer Bawa          | NIHR BRC at Guy's and St Thomas' NHS Foundation Trust                                |
| Samantha Broadhead    | NIHR BRC at Guy's and St Thomas' NHS Foundation Trust                                |
| Sadaf Farooqi         | NIHR Clinical Research Facility, Cambridge University Hospitals NHS Foundation Trust |
| Jo Piper              | NIHR Clinical Research Facility, Cambridge University Hospitals NHS Foundation Trust |
| Rowena Weighell       | NIHR Clinical Research Facility, Cambridge University Hospitals NHS Foundation Trust |
| Lorinda Pickup        | NIHR Clinical Research Facility, Cambridge University Hospitals NHS Foundation Trust |
| Djamila Shamtally     | NIHR Clinical Research Facility, Cambridge University Hospitals NHS Foundation Trust |
| Jason Domingo         | NIHR Clinical Research Facility, Cambridge University Hospitals NHS Foundation Trust |
| Evgenia Kourampa      | NIHR Clinical Research Facility, Cambridge University Hospitals NHS Foundation Trust |
| Colin Hale            | NIHR Liverpool & Broadgreen CRF                                                      |
| Jennifer Gibney       | NIHR Liverpool & Broadgreen CRF                                                      |
| Michael Stackpoole    | NIHR Liverpool & Broadgreen CRF                                                      |
| Zalina Rashid-Gardner | NIHR Liverpool & Broadgreen CRF                                                      |
| Rebecca Lyon          | NIHR Liverpool & Broadgreen CRF                                                      |
| Chloe McDonnell       | NIHR Liverpool & Broadgreen CRF                                                      |
| Christine Cole        | NIHR Liverpool & Broadgreen CRF                                                      |
| Anna Stewart          | NIHR Liverpool & Broadgreen CRF                                                      |
| Gillian McMillan      | NIHR Liverpool & Broadgreen CRF                                                      |
| Mary Savage           | NIHR Liverpool & Broadgreen CRF                                                      |
| Helen Beckett         | NIHR Liverpool & Broadgreen CRF                                                      |
| Chantelle Moorbey     | NIHR Wessex Local Clinical Research Network                                          |

|                          |                                                                                                      |
|--------------------------|------------------------------------------------------------------------------------------------------|
| Amisha Desai             | NIHR/Wellcome Clinical Research Facility,<br>University Hospitals Birmingham NHS Foundation<br>Trust |
| Claire Brown             | NIHR/Wellcome Clinical Research Facility,<br>University Hospitals Birmingham NHS Foundation<br>Trust |
| Kush Naker               | NIHR/Wellcome Clinical Research Facility,<br>University Hospitals Birmingham NHS Foundation<br>Trust |
| Ehsaan Qureshi           | NIHR/Wellcome Clinical Research Facility,<br>University Hospitals Birmingham NHS Foundation<br>Trust |
| Charlotte Trinham        | NIHR/Wellcome Clinical Research Facility,<br>University Hospitals Birmingham NHS Foundation<br>Trust |
| Charlotte Sabine         | NIHR/Wellcome Clinical Research Facility,<br>University Hospitals Birmingham NHS Foundation<br>Trust |
| Sophie Moore             | NIHR/Wellcome Clinical Research Facility,<br>University Hospitals Birmingham NHS Foundation<br>Trust |
| Steve Hurdoover          | NIHR/Wellcome Clinical Research Facility,<br>University Hospitals Birmingham NHS Foundation<br>Trust |
| Edwin Justice            | NIHR/Wellcome Clinical Research Facility,<br>University Hospitals Birmingham NHS Foundation<br>Trust |
| David Smith              | Oxford Vaccine Group, Department of Paediatrics,<br>University of Oxford, Oxford, UK                 |
| Emma Plested             | Oxford Vaccine Group, Department of Paediatrics,<br>University of Oxford, Oxford, UK                 |
| Carla Ferreira Da Silva  | Oxford Vaccine Group, Department of Paediatrics,<br>University of Oxford, Oxford, UK                 |
| Rachel White             | Oxford Vaccine Group, Department of Paediatrics,<br>University of Oxford, Oxford, UK                 |
| Hannah Robinson          | Oxford Vaccine Group, Department of Paediatrics,<br>University of Oxford, Oxford, UK                 |
| Liliana Cifuentes        | Oxford Vaccine Group, Department of Paediatrics,<br>University of Oxford, Oxford, UK                 |
| Gertraud Morshead        | Oxford Vaccine Group, Department of Paediatrics,<br>University of Oxford, Oxford, UK                 |
| Rachael Drake-Brockman   | Oxford Vaccine Group, Department of Paediatrics,<br>University of Oxford, Oxford, UK                 |
| Patrick Kinch            | Oxford Vaccine Group, Department of Paediatrics,<br>University of Oxford, Oxford, UK                 |
| Mwila Kasanyinga         | Oxford Vaccine Group, Department of Paediatrics,<br>University of Oxford, Oxford, UK                 |
| Elizabeth A. Clutterbuck | Oxford Vaccine Group, Department of Paediatrics,<br>University of Oxford, Oxford, UK                 |

|                            |                                                                                   |
|----------------------------|-----------------------------------------------------------------------------------|
| Sagida Bibi                | Oxford Vaccine Group, Department of Paediatrics, University of Oxford, Oxford, UK |
| Arabella SV Stuart         | Oxford Vaccine Group, Department of Paediatrics, University of Oxford, Oxford, UK |
| Robert H Shaw              | Oxford Vaccine Group, Department of Paediatrics, University of Oxford, Oxford, UK |
| Michael Singh              | Pharmacy Clinical Trials (Adult), Guy's and St Thomas NHS Foundation Trust        |
| Trishna Champaneri         | PHARMEExcel                                                                       |
| Margaret Irwin             | PHARMEExcel                                                                       |
| Mohammed Khan              | PHARMEExcel                                                                       |
| Alicja Kownacka            | PHARMEExcel                                                                       |
| Martha Nabunjo             | PHARMEExcel                                                                       |
| Carool Osuji               | PHARMEExcel                                                                       |
| John Hladkiwskyj           | PHARMEExcel                                                                       |
| Dominic Galvin             | PHARMEExcel                                                                       |
| Gita Patel                 | PHARMEExcel                                                                       |
| Johanna Moulard            | Portsmouth Hospitals University NHS Trust                                         |
| Beverley Longhurst         | Portsmouth Hospitals University NHS Trust                                         |
| Maria Moon                 | Portsmouth Hospitals University NHS Trust                                         |
| Beth Giddins               | Portsmouth Hospitals University NHS Trust                                         |
| Carlota Pereira Dias Alves | Portsmouth Hospitals University NHS Trust                                         |
| Leah Richmond              | Portsmouth Hospitals University NHS Trust                                         |
| Christine Minnis           | Portsmouth Hospitals University NHS Trust                                         |
| Sonia Baryschpolec         | Portsmouth Hospitals University NHS Trust                                         |
| Scott Elliott              | Portsmouth Hospitals University NHS Trust                                         |

|                    |                                                                  |
|--------------------|------------------------------------------------------------------|
| Lauren Fox         | Portsmouth Hospitals University NHS Trust                        |
| Victoria Graham    | Public Health England                                            |
| Natalie Baker      | Public Health England                                            |
| Kerry Godwin       | Public Health England                                            |
| Karren Buttigieg   | Public Health England                                            |
| Chanice Knight     | Public Health England                                            |
| Phillip Brown      | Public Health England                                            |
| Paminder Lall      | Public Health England                                            |
| Imam Shaik         | Public Health England                                            |
| Emily Chiplin      | Public Health England                                            |
| Emily Brunt        | Public Health England                                            |
| Stephanie Leung    | Public Health England                                            |
| Lauren Allen       | Public Health England                                            |
| Steve Thomas       | Public Health England                                            |
| Sara Fraser        | Public Health England                                            |
| Bea Choi           | Public Health England                                            |
| Jade Gouriet       | Public Health England                                            |
| Andrew Freedman    | Public Health Wales                                              |
| Jonathan Perkins   | Queen Elizabeth University Hospital, NHS Greater Glasgow & Clyde |
| Andrew Gowland     | Queen Elizabeth University Hospital, NHS Greater Glasgow & Clyde |
| Jonathan Macdonald | Queen Elizabeth University Hospital, NHS Greater Glasgow & Clyde |
| John Paul Seenan   | Queen Elizabeth University Hospital, NHS Greater Glasgow & Clyde |



|                  |                                                                  |
|------------------|------------------------------------------------------------------|
| Igor Starinskij  | Queen Elizabeth University Hospital, NHS Greater Glasgow & Clyde |
| Andrew Seaton    | Queen Elizabeth University Hospital, NHS Greater Glasgow & Clyde |
| Erica Peters     | Queen Elizabeth University Hospital, NHS Greater Glasgow & Clyde |
| Stephen Singh    | Royal Devon and Exeter Hospital                                  |
| Ben Gardside     | Royal Devon and Exeter Hospital                                  |
| Avril Bonnaud    | Royal Devon and Exeter Hospital                                  |
| Ceri Davies      | Royal Devon and Exeter Hospital                                  |
| Elizabeth Gordon | Royal Devon and Exeter Hospital                                  |
| Samantha Keenan  | Royal Devon and Exeter Hospital                                  |
| Jane Hall        | Royal Devon and Exeter Hospital                                  |
| Suzanne Wilkins  | Royal Devon and Exeter Hospital                                  |
| Suzanne Tasker   | Royal Devon and Exeter Hospital                                  |
| Rob James        | Royal Devon and Exeter Hospital                                  |
| Ingrid Seath     | Royal Devon and Exeter Hospital                                  |
| Kelly Littlewood | Royal Devon and Exeter Hospital                                  |
| Joseph Newman    | Royal Papworth Hospital NHS Foundation Trust                     |
| Iryna Boubriak   | Royal Papworth Hospital NHS Foundation Trust                     |
| Debbie Suggitt   | Stockport NHS Foundation Trust                                   |
| Helen Haydock    | Stockport NHS Foundation Trust                                   |
| Sara Bennett     | Stockport NHS Foundation Trust                                   |
| Wiesia Woodyatt  | Stockport NHS Foundation Trust                                   |
| Kerry Hughes     | Stockport NHS Foundation Trust                                   |

|                       |                                                          |
|-----------------------|----------------------------------------------------------|
| Judith Bell           | Stockport NHS Foundation Trust                           |
| Tricia Coughlan       | Stockport NHS Foundation Trust                           |
| Donald van Welsenens  | Stockport NHS Foundation Trust                           |
| Mohammed Kamal        | Stockport NHS Foundation Trust                           |
| Chris Cooper          | Stockport NHS Foundation Trust                           |
| Simon Tunstall        | Stockport NHS Foundation Trust                           |
| Nicholas Ronan        | Stockport NHS Foundation Trust                           |
| Rebecca Cutts         | The Adam Practice                                        |
| Tracey Dare           | The Adam Practice                                        |
| Yee Ting Nicole Yim   | University College London Hospitals NHS Foundation Trust |
| Sarah Whittley        | University College London Hospitals NHS Foundation Trust |
| Marivic Ricamara      | University College London Hospitals NHS Foundation Trust |
| Shama Hamal           | University College London Hospitals NHS Foundation Trust |
| Kirsty Adams          | University College London Hospitals NHS Foundation Trust |
| Holly Baker           | University College London Hospitals NHS Foundation Trust |
| Kimberley Driver      | University College London Hospitals NHS Foundation Trust |
| Nicola Turner         | University College London Hospitals NHS Foundation Trust |
| Todd Rawlins          | University College London Hospitals NHS Foundation Trust |
| Subarna Roy           | University College London Hospitals NHS Foundation Trust |
| Marta Merida-Morillas | University College London Hospitals NHS Foundation Trust |
| Yukari Sakagami       | University College London Hospitals NHS Foundation Trust |
| Antonette Andrews     | University College London Hospitals NHS Foundation Trust |

|                            |                                                      |
|----------------------------|------------------------------------------------------|
| Lillian Goncalves cordeiro | University Hospital Southampton NHS Foundation Trust |
| Matthew Stokes             | University Hospital Southampton NHS Foundation Trust |
| Wythehi Ambihapathy        | University Hospital Southampton NHS Foundation Trust |
| Joanne Spencer             | University Hospital Southampton NHS Foundation Trust |
| Nina Parungao              | University Hospital Southampton NHS Foundation Trust |
| Lisa Berry                 | University Hospital Southampton NHS Foundation Trust |
| James Cullinane            | University Hospital Southampton NHS Foundation Trust |
| Laura Presland             | University Hospital Southampton NHS Foundation Trust |
| Amy Ross-Russell           | University Hospital Southampton NHS Foundation Trust |
| Sarah Warren               | University Hospital Southampton NHS Foundation Trust |
| Jonathan Baker             | University Hospital Southampton NHS Foundation Trust |
| Abigail Oliver             | University Hospital Southampton NHS Foundation Trust |
| Amanda Buadi               | University Hospital Southampton NHS Foundation Trust |
| Kim Lee                    | University Hospital Southampton NHS Foundation Trust |
| Louise Haskell             | University Hospital Southampton NHS Foundation Trust |
| Rossana Romani             | University Hospital Southampton NHS Foundation Trust |
| Ian Bentley                | University Hospital Southampton NHS Foundation Trust |
| Tim Whitbred               | University Hospital Southampton NHS Foundation Trust |
| Simon Fowler               | University Hospital Southampton NHS Foundation Trust |
| John Gavin                 | University Hospital Southampton NHS Foundation Trust |
| Alan Magee                 | University Hospital Southampton NHS Foundation Trust |
| Tara Watson                | University Hospital Southampton NHS Foundation Trust |

|                       |                                                      |
|-----------------------|------------------------------------------------------|
| Kari Nightingale      | University Hospital Southampton NHS Foundation Trust |
| Phedra Marius         | University Hospital Southampton NHS Foundation Trust |
| Eloise Summerton      | University Hospital Southampton NHS Foundation Trust |
| Emily Locke           | University Hospital Southampton NHS Foundation Trust |
| Thomas Honey          | University Hospital Southampton NHS Foundation Trust |
| Aidan Lingwood        | University Hospital Southampton NHS Foundation Trust |
| Anastasia de la Haye  | University Hospital Southampton NHS Foundation Trust |
| Ryan Stephen Elliott  | University Hospital Southampton NHS Foundation Trust |
| Karen Underwood       | University Hospital Southampton NHS Foundation Trust |
| Mikayala King         | University Hospital Southampton NHS Foundation Trust |
| Sharon Davies-Dear    | University Hospital Southampton NHS Foundation Trust |
| Emily Horsfall        | University Hospital Southampton NHS Foundation Trust |
| Olivia Chalwin        | University Hospital Southampton NHS Foundation Trust |
| Holly Burton          | University Hospital Southampton NHS Foundation Trust |
| Christopher J Edwards | University Hospital Southampton NHS Foundation Trust |
| Benjamin Welham       | University Hospital Southampton NHS Foundation Trust |
| Sarah Garrahy         | University Hospital Sussex NHS Trust                 |
| Fran Hall             | University Hospital Sussex NHS Trust                 |
| Eleni Ladikou         | University Hospital Sussex NHS Trust                 |
| Dee Mullan            | University Hospital Sussex NHS Trust                 |
| Daniel Hansen         | University Hospital Sussex NHS Trust                 |
| Marion Campbell       | University Hospital Sussex NHS Trust                 |

|                      |                                             |
|----------------------|---------------------------------------------|
| Filipa Dos Santos    | University Hospital Sussex NHS Trust        |
| Haniah Habash-Bailey | University Hospital Sussex NHS Trust        |
| Nicki Lakeman        | University Hospitals Dorset                 |
| Debbie Branney       | University Hospitals Dorset                 |
| Luke Vamplew         | University Hospitals Dorset                 |
| Alison Hogan         | University Hospitals Dorset                 |
| Jorden Frankham      | University Hospitals Dorset                 |
| Martin Wiselka       | University Hospitals of Leicester NHS Trust |
| Denny Vail           | University Hospitals of Leicester NHS Trust |
| Victoria Wenn        | University Hospitals of Leicester NHS Trust |
| Valerie Renals       | University Hospitals of Leicester NHS Trust |
| Kate Ellis           | University Hospitals of Leicester NHS Trust |
| Jessica Lewis-Taylor | University Hospitals of Leicester NHS Trust |
| Javier Magan         | NIHR Wessex Clinical Research network       |
| Anna Hardy           | NIHR Wessex Clinical Research network       |
| Kim Appleby          | NIHR Wessex Clinical Research Network       |
